# Supplementary material for: Single-Cell Analysis of Proxy Reporter Allele-Marked Epithelial Cells Establishes Intestinal Stem Cell Hierarchy
Source: PubMed Central journal article supplement — Stem Cell Reports. 2014 Oct 23;3(5):876–91. doi: 10.1016/j.stemcr.2014.09.011 (PMC4235148; doi:10.1016/j.stemcr.2014.09.011), 2014-10-23

# Correlation Matrix: Lgr5 Samples

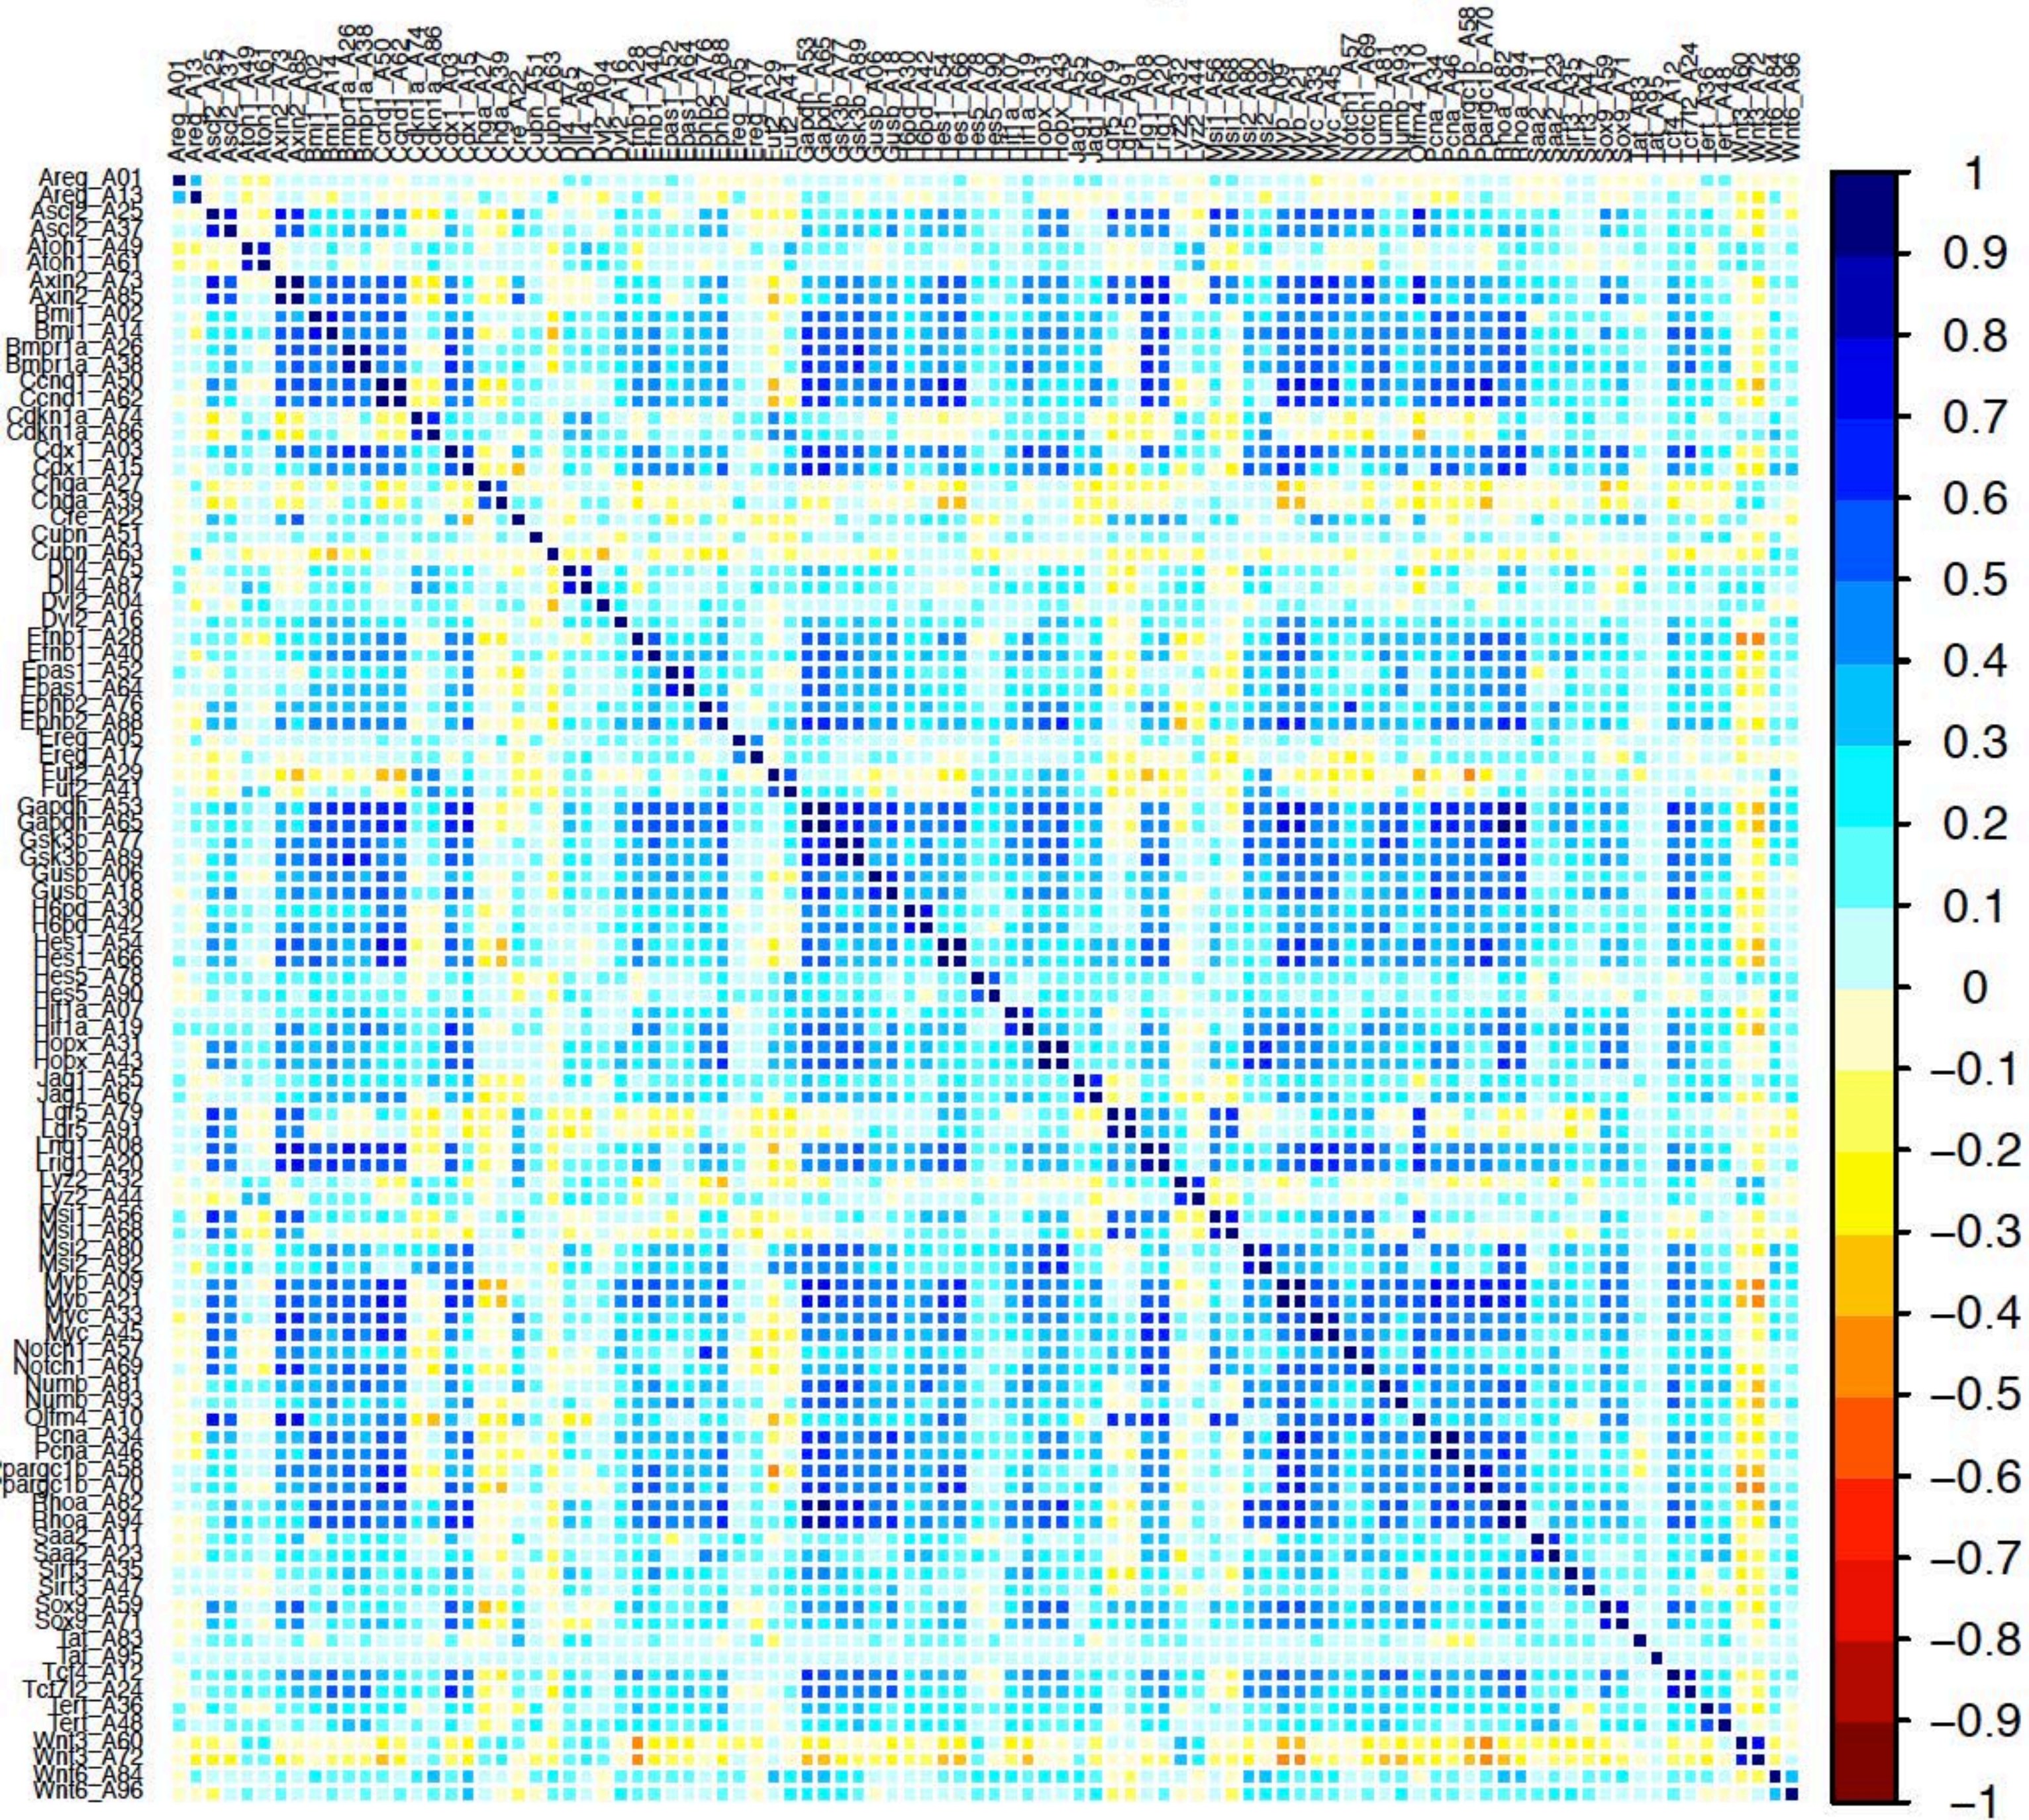

# Correlation Matrix: Bmi1 Samples

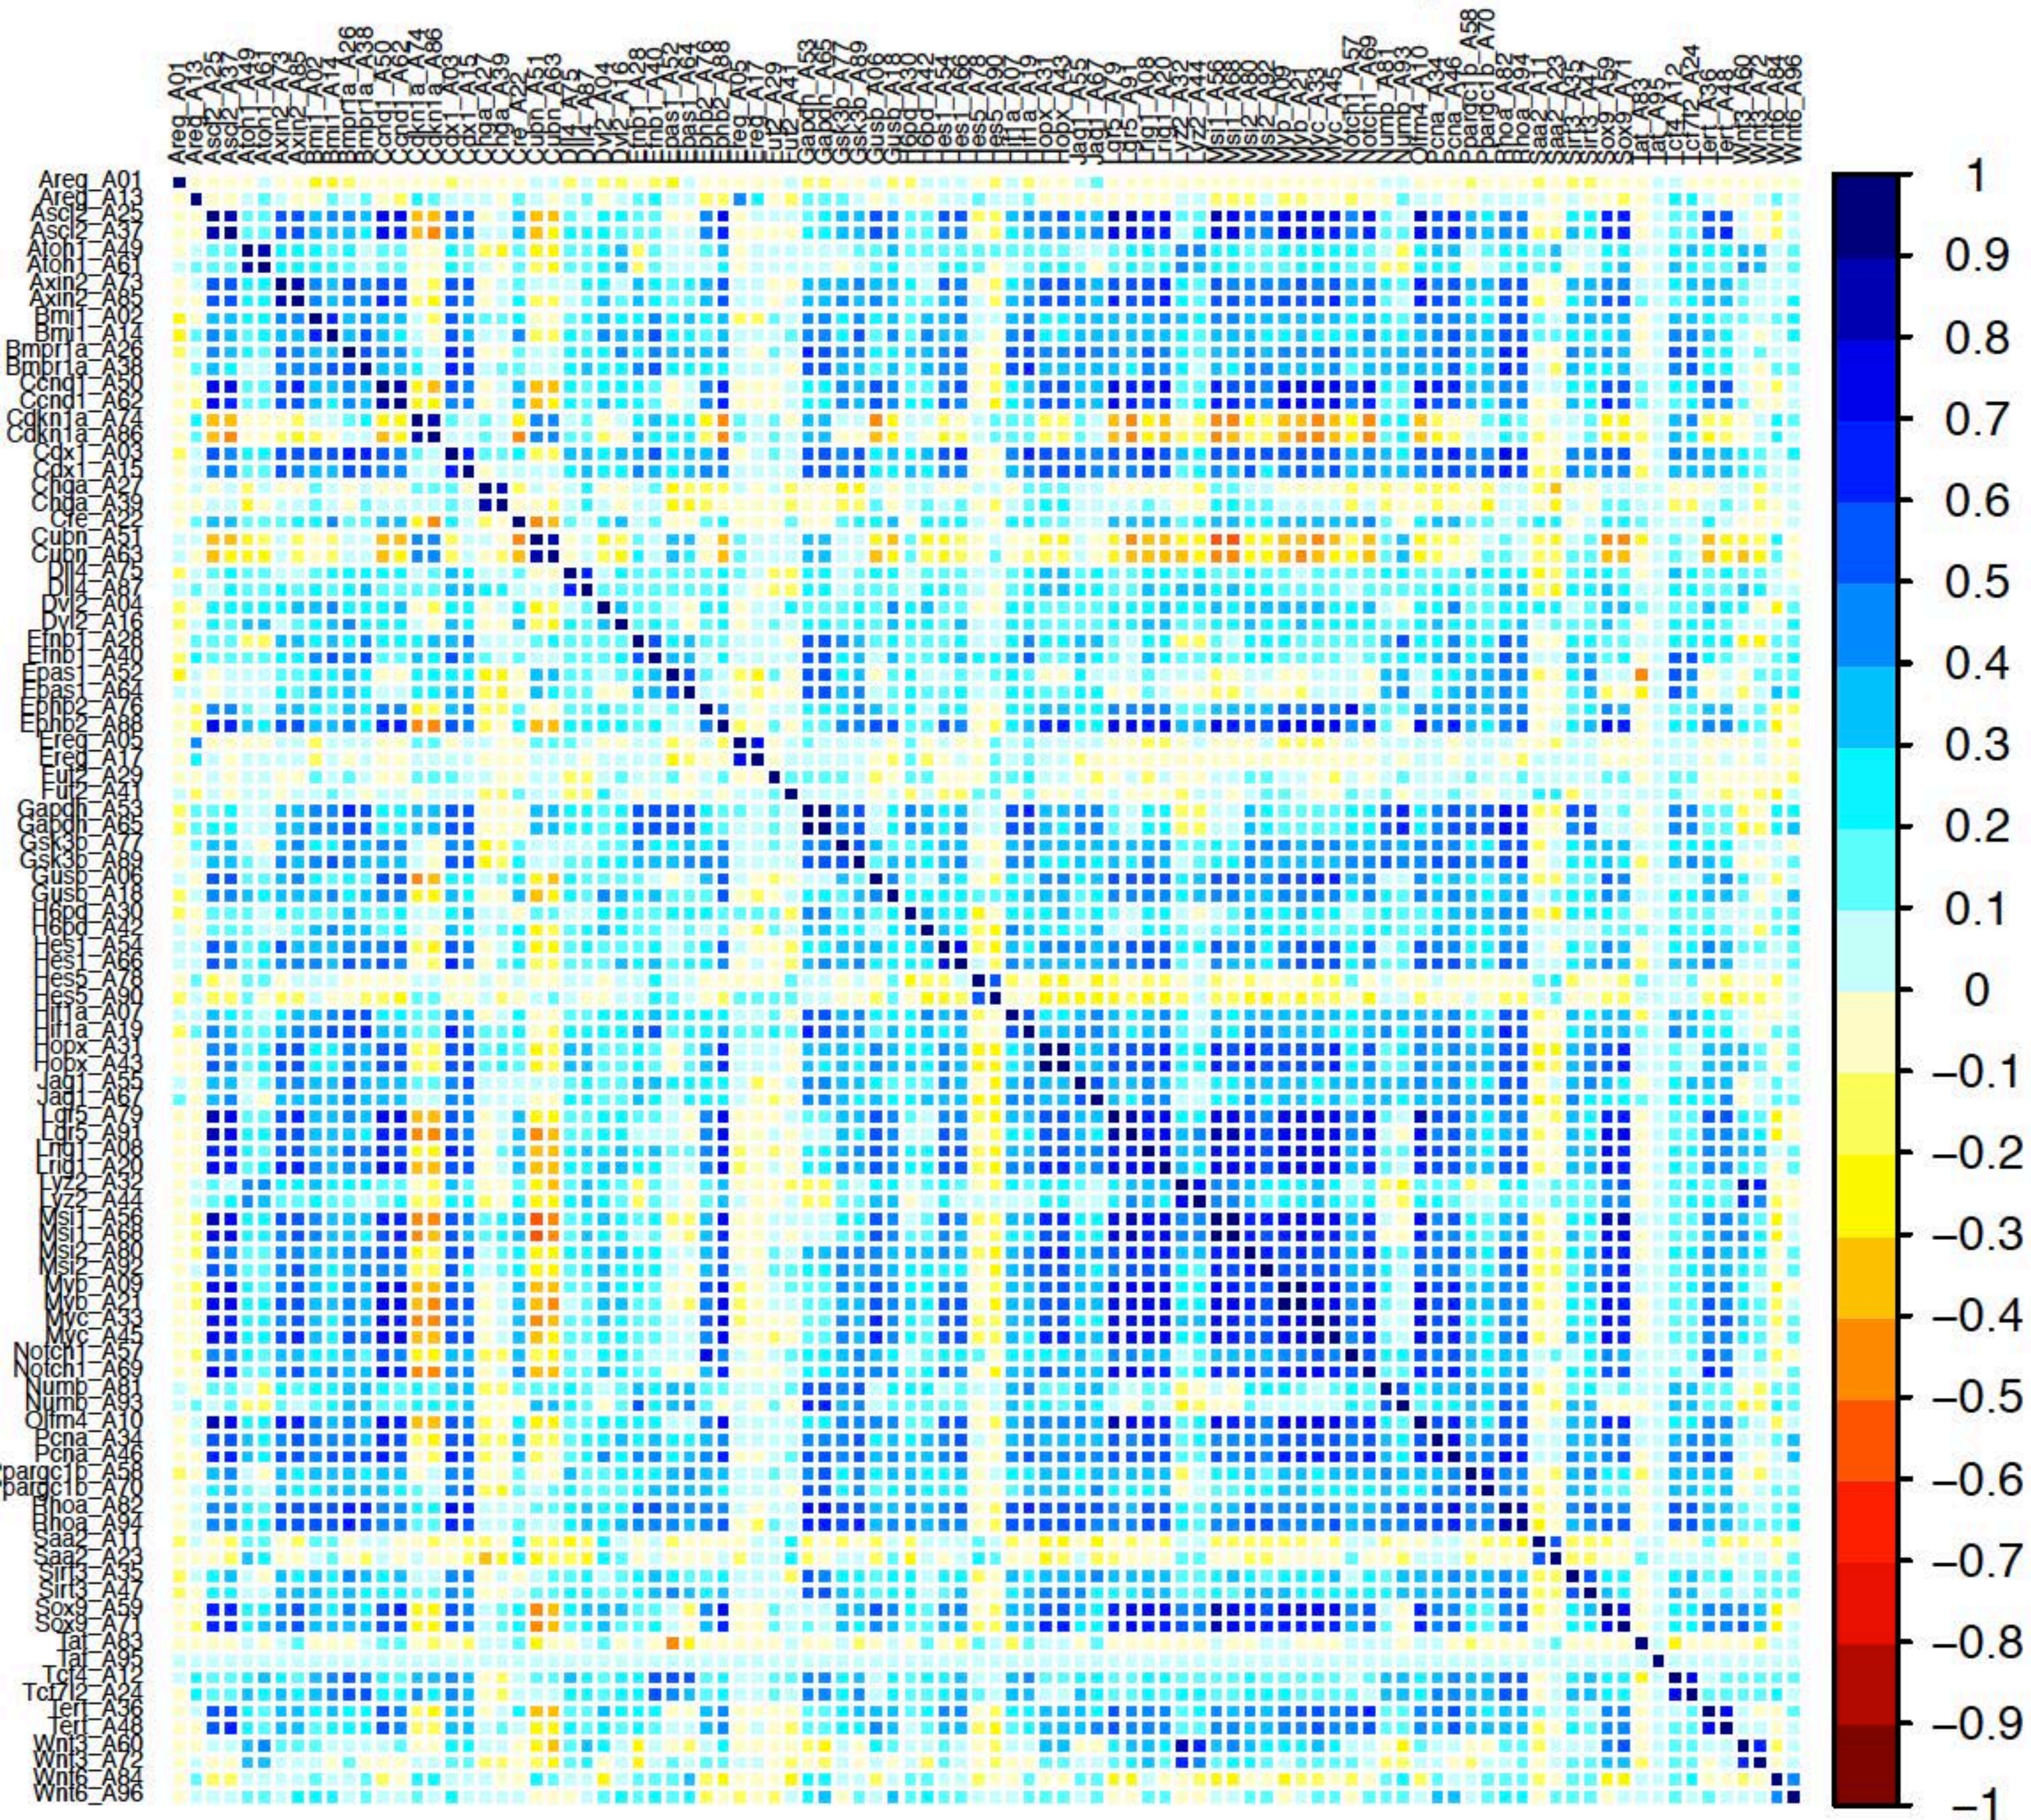

# Correlation Matrix: HopX Samples

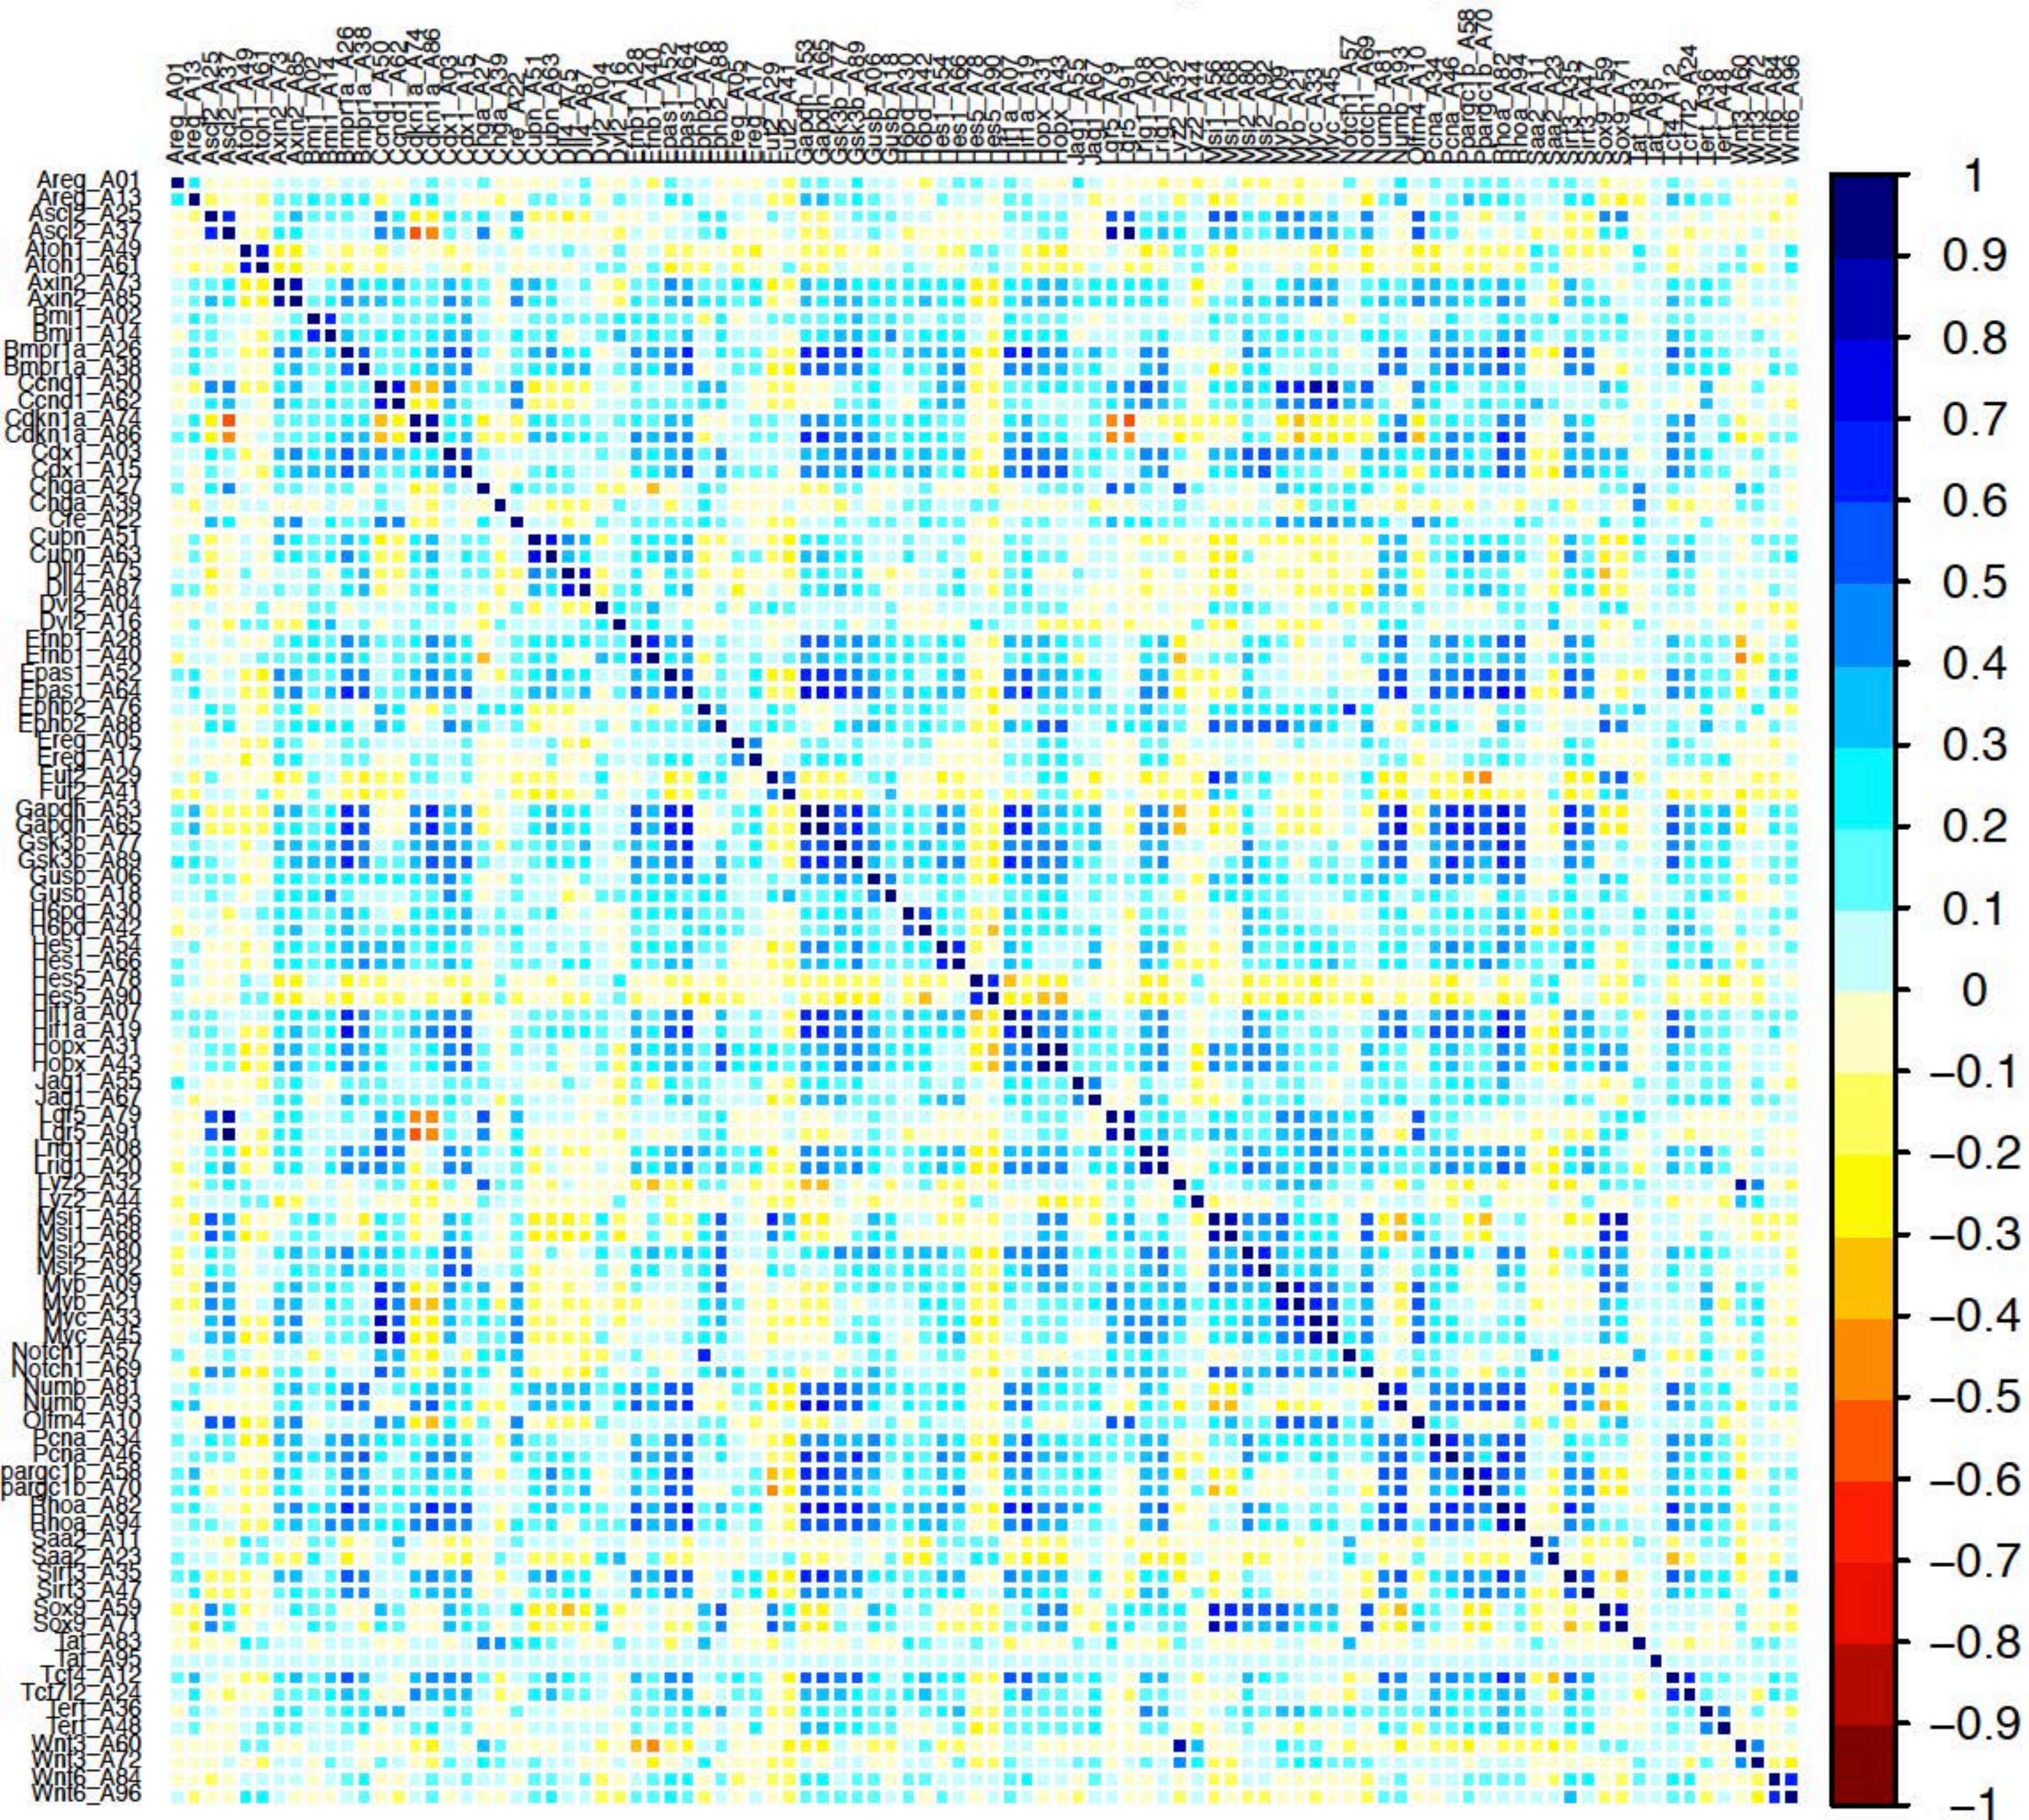

# Correlation Matrix: HopXGFPhigh Samples

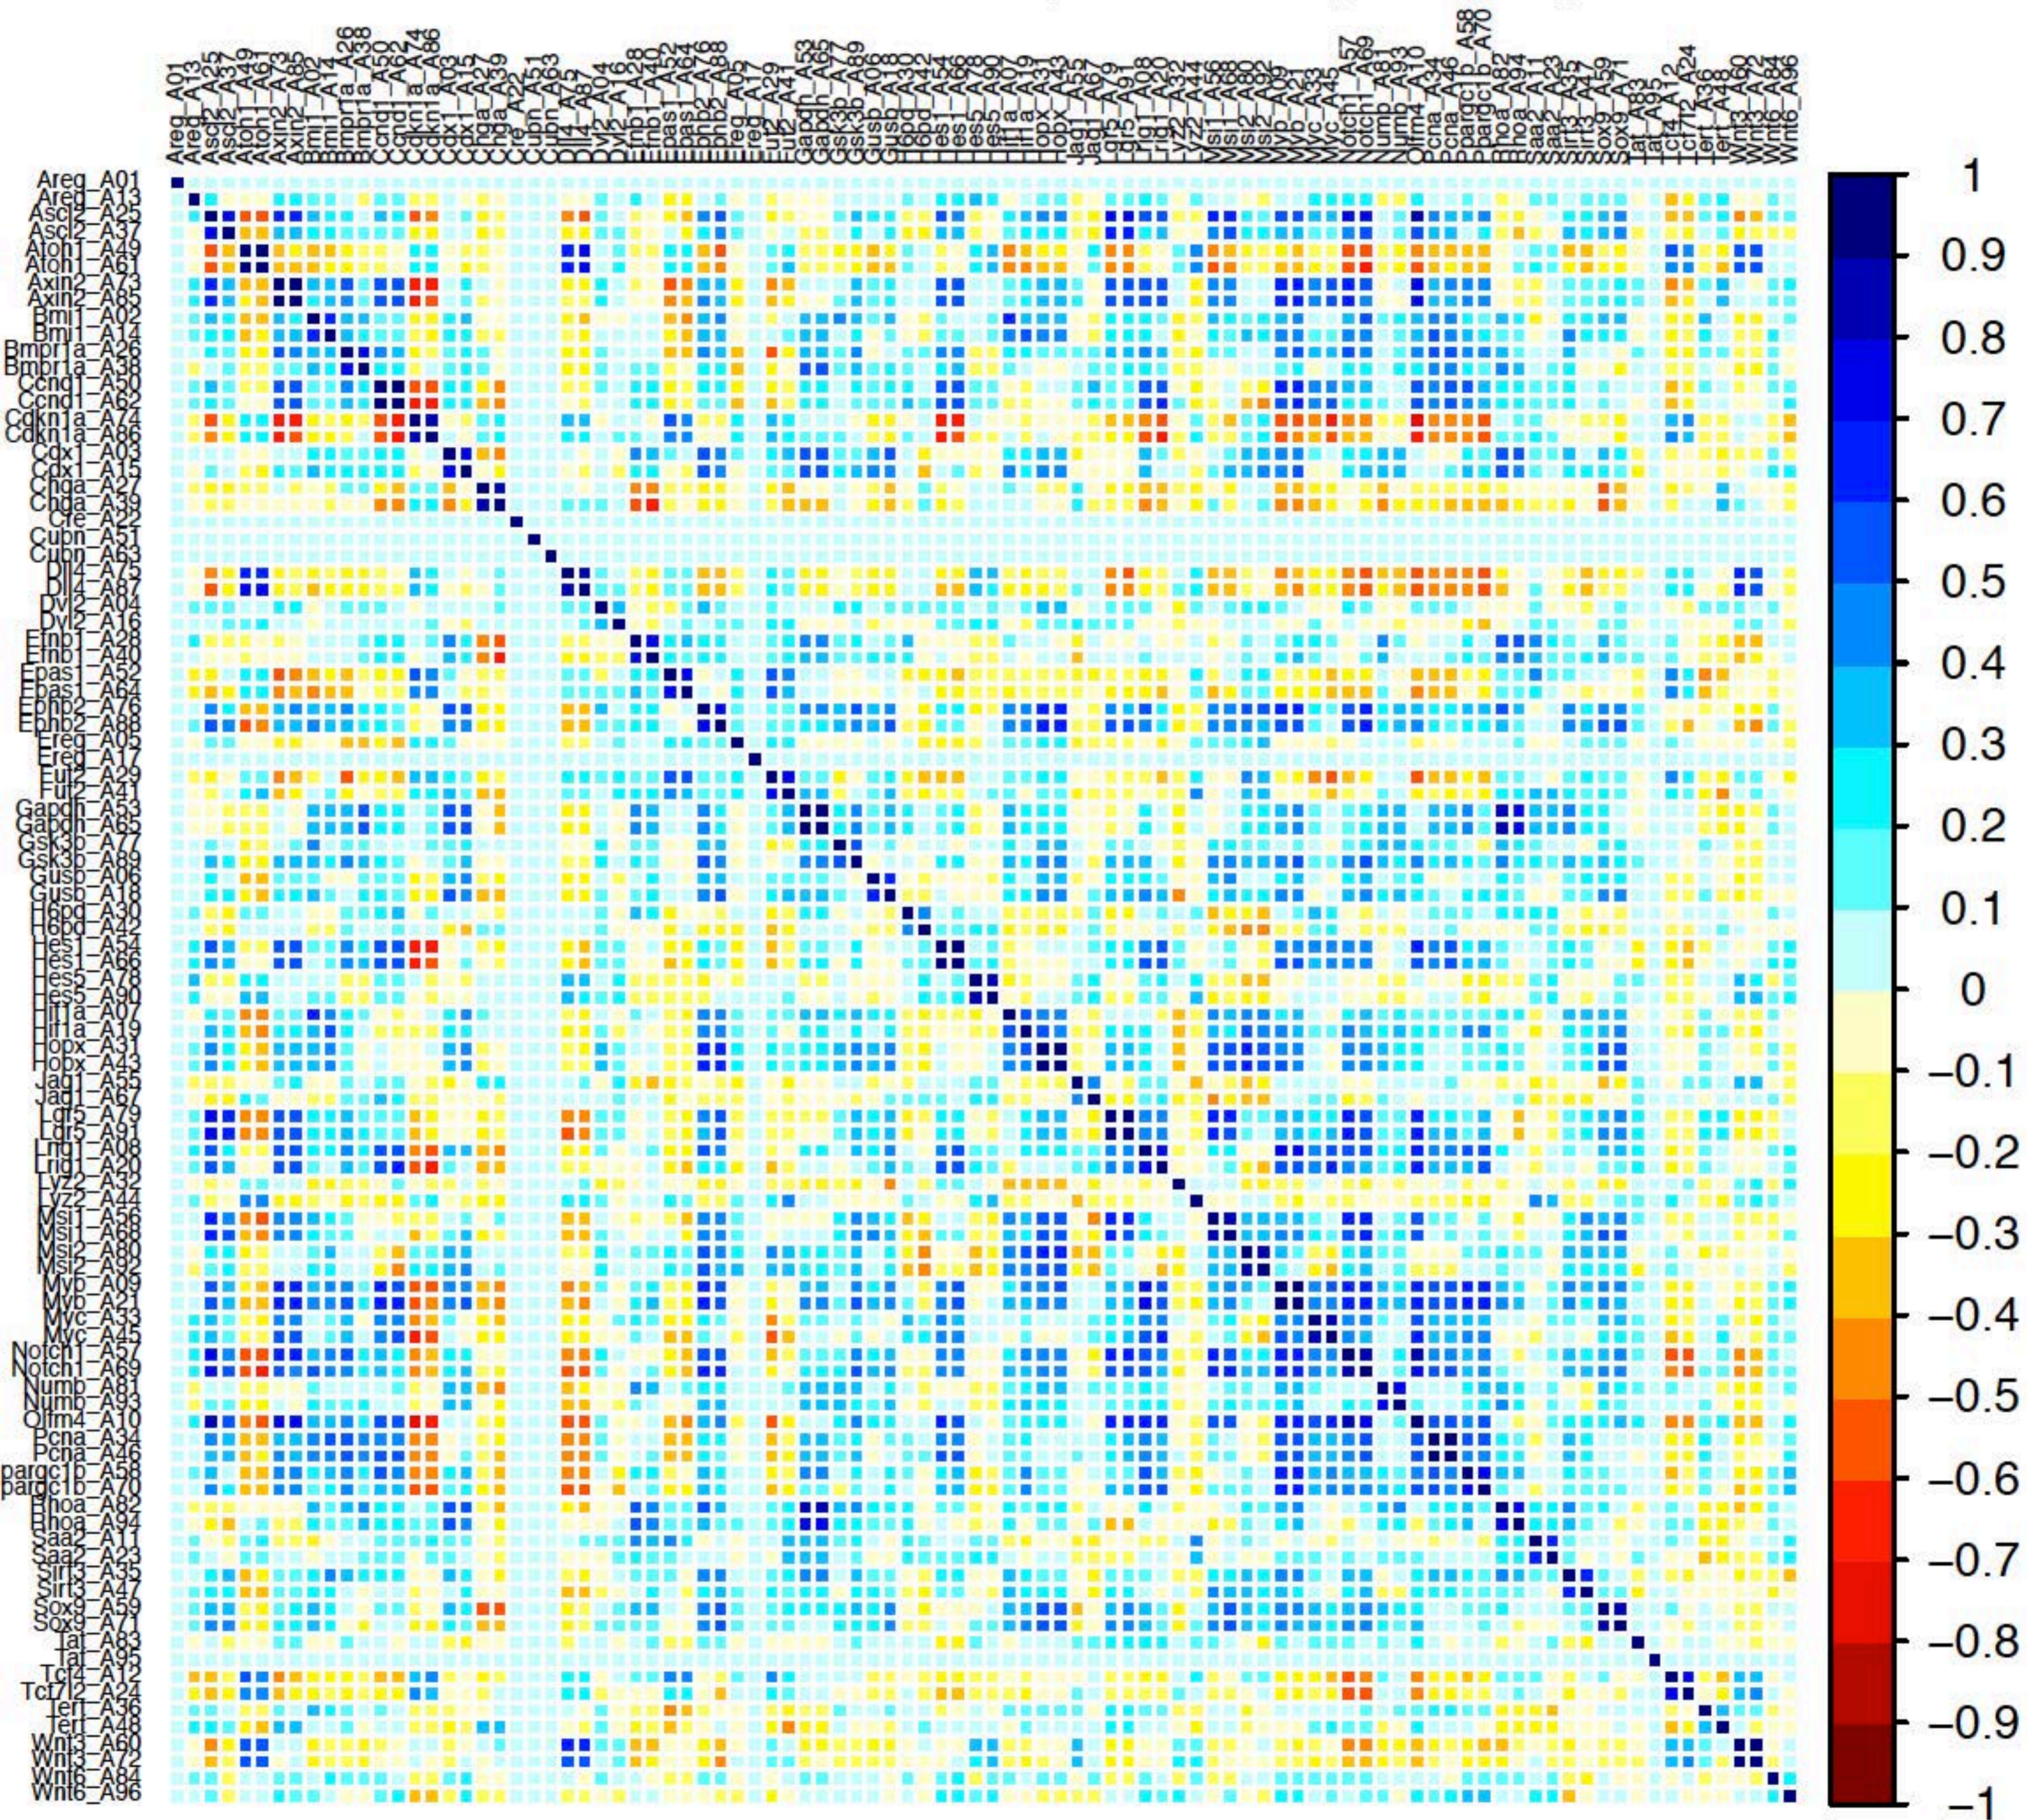



# Correlation Matrix: HopXGFPsmall Samples

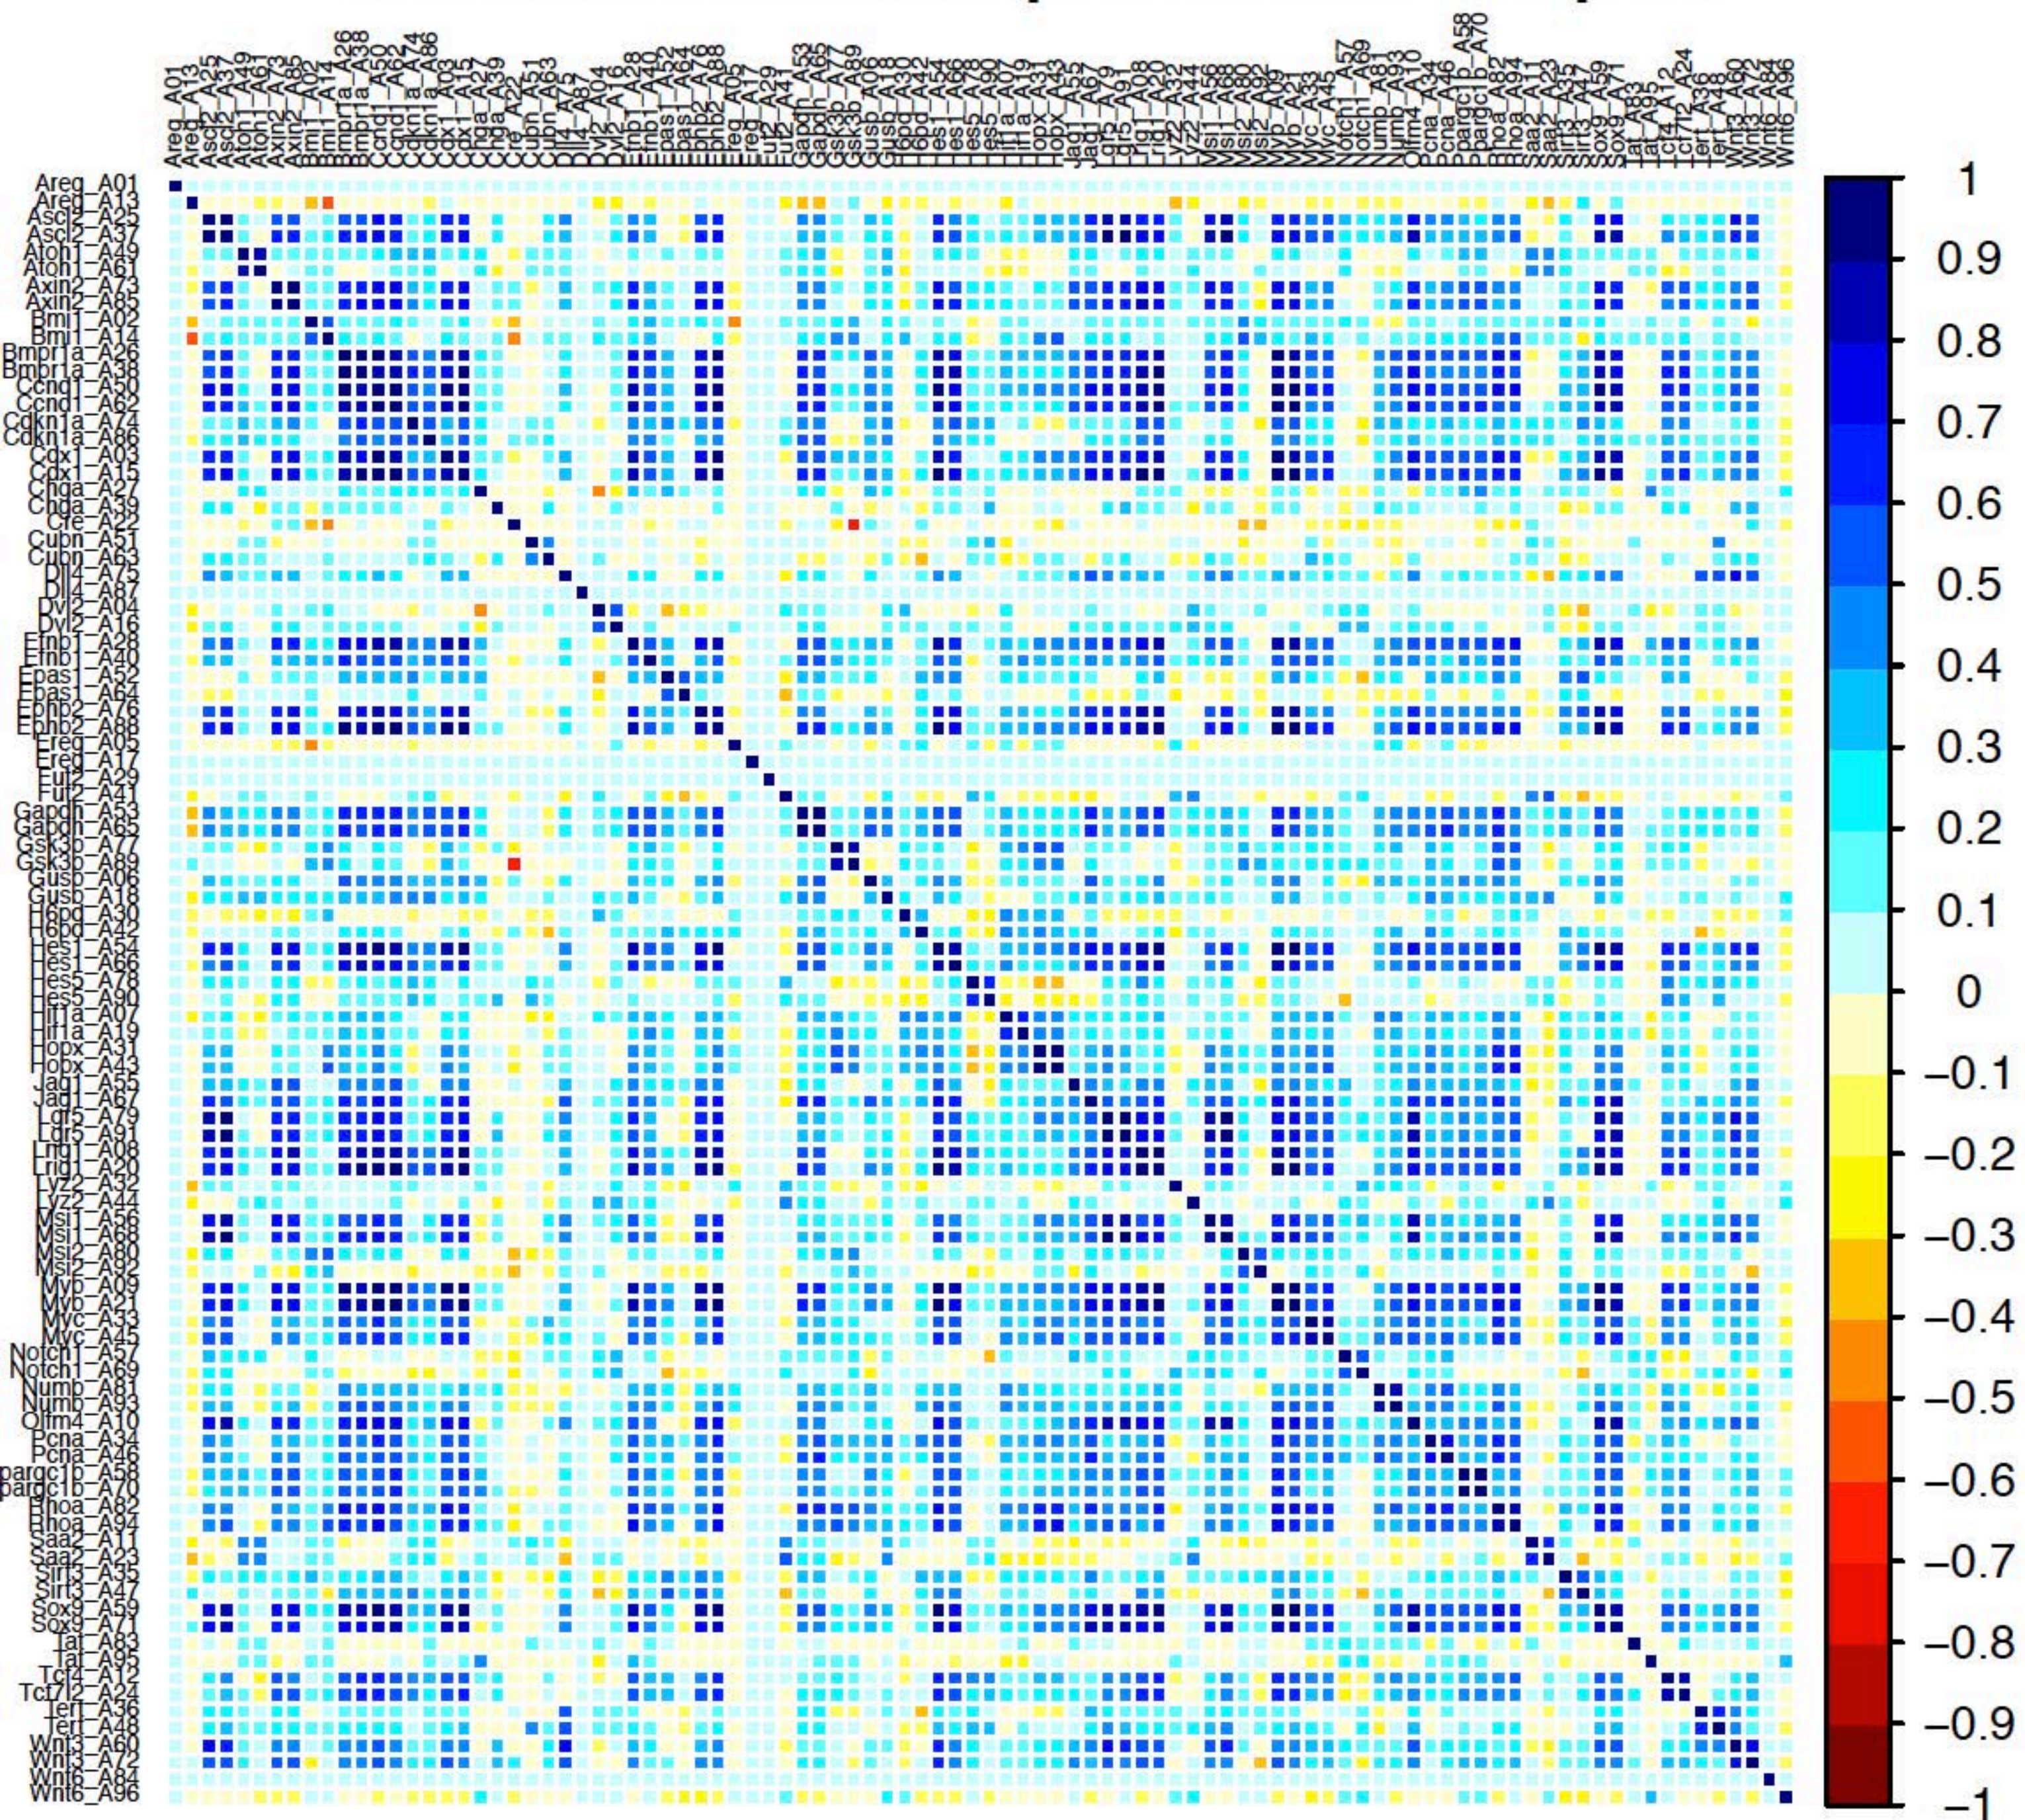

Supplement: mmc5.pdf [file mmc5.pdf]
