# Supplementary material for: Single-Cell Analysis of Proxy Reporter Allele-Marked Epithelial Cells Establishes Intestinal Stem Cell Hierarchy
Source: PubMed Central journal article supplement — Stem Cell Reports. 2014 Oct 23;3(5):876–91. doi: 10.1016/j.stemcr.2014.09.011 (PMC4235148; doi:10.1016/j.stemcr.2014.09.011), 2014-10-23
Supplement: mmc6.pdf [file mmc6.pdf]

## Single-Cell Analysis of Proxy Reporter Allele-Marked Epithelial Cells Establishes Intestinal Stem Cell Hierarchy

Ning Li,<sup>1</sup> Maryam Yousefi,<sup>1,5</sup> Angela Nakauka-Ddamba,<sup>1</sup> Rajan Jain,<sup>2</sup> John Tobias,<sup>6</sup> Jonathan A. Epstein,<sup>2,3,5</sup> Shane T. Jensen,<sup>7</sup> and Christopher J. Lengner<sup>1,2,3,4,5,\*</sup>

<sup>1</sup>Department of Animal Biology, School of Veterinary Medicine

<sup>2</sup>Department of Cell and Developmental Biology, School of Medicine

<sup>3</sup>Institute for Regenerative Medicine

<sup>4</sup>Center for Molecular Studies in Digestive and Liver Diseases

<sup>5</sup>Program in Cell and Molecular Biology

<sup>6</sup>PENN Molecular Profiling Facility

<sup>7</sup>Department of Statistics, The Wharton School

University of Pennsylvania, Philadelphia, PA 19104, USA

\*Correspondence: [lengner@vet.upenn.edu](mailto:lengner@vet.upenn.edu)

<http://dx.doi.org/10.1016/j.stemcr.2014.09.011>

This is an open access article under the CC BY-NC-ND license (<http://creativecommons.org/licenses/by-nc-nd/3.0/>).

### SUMMARY

The recent development of targeted murine reporter alleles as proxies for intestinal stem cell activity has led to significant advances in our understanding of somatic stem cell hierarchies and dynamics. Analysis of these reporters has led to a model in which an indispensable reserve stem cell at the top of the hierarchy (marked by *Bmi1* and *Hopx* reporters) gives rise to active intestinal stem cells (marked by an *Lgr5* reporter). Despite these advances, controversy exists regarding the specificity and fidelity with which these alleles distinguish intestinal stem cell populations. Here, we undertake a comprehensive comparison of widely used proxy reporters including both *CreERT2* and *EGFP* cassettes targeted to the *Lgr5*, *Bmi1*, and *Hopx* loci. Single-cell transcriptional profiling of these populations and their progeny reveals that reserve and active intestinal stem cells are molecularly and functionally distinct, supporting a two-stem-cell model for intestinal self-renewal.

### INTRODUCTION

The intestinal epithelium provides a paradigmatic model for understanding stem cell organization and dynamics in highly proliferative tissues. The past decade has seen numerous breakthroughs in our understanding of intestinal stem cells (ISCs). Prior to 2007, the existence of ISCs at the base of small intestinal crypts was a subject of speculation. Undifferentiated, radiosensitive label-retaining cells (LRCs) around the +4 position from the crypt base had long been postulated to be ISCs (Potten et al., 2002); however, no functional data verifying the developmental capacity of these cells existed.

Beginning in 2007, a series of landmark studies identified several loci that marked functional intestinal stem cells upon insertion of an inducible Cre recombinase (*CreERT2*). The first locus identified was *Lgr5*, a canonical Wnt/ $\beta$ -catenin target gene that encodes an R-spondin receptor whose activity, in turn, potentiates canonical Wnt signaling (de Lau et al., 2011). An *EGFP-IRES-CreERT2* reporter at the *Lgr5* transcriptional start site marks actively cycling crypt base columnar cells (CBCs) that self-renew and give rise to all the differentiated progeny of the small intestine (Barker et al., 2007). *Lgr5*<sup>+</sup> CBCs are capable of in vitro intestinal organoid formation and contribute to the colonic epithelium upon transplantation (Sato et al., 2009; Yui et al., 2012). These findings were surprising in light of the longstanding belief that LRCs represented the ISC population.

Shortly after the identification of *Lgr5*<sup>+</sup> CBCs, the Capecchi group inserted an *IRES-CreERT2* cassette into the *Bmi1* locus following findings that this polycomb complex component played a critical role in hematopoietic and neural stem cell self-renewal (Molofsky et al., 2003; Park et al., 2003). Remarkably, the *Bmi1-CreERT2* reporter marked relatively rare cells residing at the +4 position, on average, from the intestinal crypt base (Sangiorgi and Capecchi, 2008). As with *Lgr5*, *Bmi1-CreERT2*-marked cells continually gave rise to all functional cell types of the intestinal epithelium over long periods of time, clearly demonstrating their functional capacity as ISCs (Sangiorgi and Capecchi, 2008).

The functional hierarchy of these stem cells was elucidated through the use of diphtheria toxin (DT)-mediated cell ablation. *Bmi1-CreERT2* mice containing a *lox-stop-lox-DT* transgene enabled the ablation of *Bmi1*-expressing ISCs. This resulted in loss of intestinal crypts and tissue integrity (Sangiorgi and Capecchi, 2008). Remarkably, an analogous experiment performed with a diphtheria toxin receptor inserted into the endogenous *Lgr5* locus (*Lgr5-DTR*) followed by DT treatment efficiently ablated all CBCs with no functional consequences for the homeostatic epithelium (Tian et al., 2011). In this model, an increase in the frequency of cells marked with a *Bmi1-EGFP*<sup>+</sup> knockin reporter was observed upon *Lgr5*<sup>+</sup> CBC ablation, and lineage tracing with *Bmi1-CreERT2* demonstrated that these cells give rise to *Lgr5*<sup>+</sup> CBCs. Interestingly, *Bmi1-CreERT2*-marked cells were found to be insensitive to stimulation and

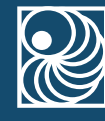

antagonism of the canonical Wnt pathway that drives self-renewal of CBCs (Yan et al., 2012). These findings support a model in which *Bmi1-CreERT2* cells represent a reserve ISC that gives rise to an active, *Lgr5*<sup>+</sup> CBC stem cell that bears the proliferative burden necessary to maintain homeostasis.

Insight into the benefits of such a two-stem-cell system (Li and Clevers, 2010) came from studying the response of the epithelium to acute injury. High-dose (12–14 Gy)  $\gamma$ -irradiation ( $\gamma$ -IR) quantitatively ablates the vast majority if not all *Lgr5*<sup>+</sup> CBCs (Yan et al., 2012), as well as LRCs (Potten et al., 2002). Reserve ISCs are resistant to high-dose radiation and become activated to generate new *Lgr5*<sup>+</sup> CBCs in order to repopulate the epithelium (Tian et al., 2011; Yan et al., 2012). In this context, *Lgr5*<sup>+</sup> cells are indispensable, possibly due to the tremendous proliferative output required to regenerate the entire tissue and/or activation of the *Lgr5-DTR* allele in reserve ISCs as they convert to CBCs (Metcalfe et al., 2014).

Further support for the hierarchical two-stem-cell model came with the discovery of an additional reserve ISC marker locus, *Hopx*, encoding an atypical homeodomain protein with functions in early heart development (Chen et al., 2002). An *IRES-CreERT2* cassette inserted into the endogenous *Hopx* locus revealed that, like *Bmi1-CreERT2* cells, *Hopx-CreERT2* cells are capable of giving rise to *Lgr5*<sup>+</sup> cells (Takeda et al., 2011). Thus, reserve ISCs give rise to progeny including active *Lgr5*<sup>+</sup> CBCs that become dependent on canonical Wnt activity. The precise relationship between *Hopx-CreERT2*- and *Bmi1-CreERT2*-marked cells remains unexamined.

Despite the elegant genetic evidence supporting the existence of a two-stem-cell system (active CBCs and reserve ISCs), considerable controversy exists regarding the identity of these stem cells and their relationship to one another. Specifically, the messenger RNAs emanating from the endogenous loci used in generation of marker alleles including *Bmi1*, *Tert*, and *Hopx* exist at higher levels in the *Lgr5-EGFP*-high population in comparison to the *Lgr5-EGFP*-low population (Muñoz et al., 2012), and the endogenous *Bmi1* and *Tert* transcripts can be detected throughout almost all cells of the crypt below the transit-amplifying (T/A) zone (Itzkovitz et al., 2012). These findings led to suggestions that the marked stem cells may represent a single population or that they exist in a continuum, not discernible as distinct populations. Many of these discrepancies could be accounted for if, in fact, these reporter alleles mark heterogeneous populations that are mistakenly assumed to be homogenous in population-based analyses and/or if the presence of endogenous mRNAs does not correlate with reporter activity emanating from a single locus.

Further complexities in our understanding of ISC biology arose in recent reports describing the existence of secretory precursor cells of the intestine. One report described these

secretory precursors as long-lived LRCs that express high levels of *Lgr5* and resist intermediate doses of  $\gamma$ -IR (6 Gy; Buczacki et al., 2013). This finding was particularly curious in light of classic studies describing the intestinal LRC as being exquisitely radiosensitive (undergoing apoptosis in response to as little as 1 Gy  $\gamma$ -IR; Potten et al., 2002), and studies using highly sensitive multi-isotope imaging mass spectrometry suggest that there are no LRCs in the intestinal epithelium (Steinhauser et al., 2012). Thus, the existence and identity of LRCs of the intestinal epithelium remains controversial, and how these cells relate to the reserve ISCs marked by *Bmi1*- or *Hopx-CreERT2* activity is entirely unknown.

In a separate study, another group identified secretory precursor cells as a proliferative population marked by expression of the Notch ligand *Dll1* (van Es et al., 2012). These cells have a very specific gene-expression pattern with high expression of Notch ligands (*Dll1*), low levels of Notch receptors and target genes (*Hes*), and high levels of *Atoh1* (*Math1*), which is suppressed by Notch signaling and promotes differentiation into the secretory lineage (van Es et al., 2012). In contrast to the secretory LRCs, the *Dll1*<sup>+</sup> secretory precursors do not express Wnt target genes including *Lgr5* (van Es et al., 2012). Interestingly, both the *Dll1*<sup>+</sup> and label-retaining secretory precursor cells exhibited broad stem cell activity (generating not only secretory lineages) in response to epithelial damage, although these were rare events (Buczacki et al., 2013; van Es et al., 2012).

In an attempt to reconcile conflicting reports in the literature and provide a foundation for understanding intestinal stem cell dynamics and hierarchy moving forward, we undertook a comprehensive comparative analysis of established ISC knockin reporter alleles including *Lgr5-EGFP-IRES-CreERT2*, *Bmi1-EGFP*, *Bmi1-CreERT2*, *Hopx-CreERT2*, and *Hopx-EGFP*. We apply single-cell analyses to address the heterogeneity inherent in these populations, whether they exist as molecularly distinct stem cell pools, and how they differ in their proliferative output. Through the analysis of Wnt, Notch, proliferation, differentiation, and stem-cell-related transcripts along with lineage tracing and cell cycle analyses, we place these marked populations in a model hierarchy. Our findings begin to reconcile the contrasting literature regarding the identity of ISC populations marked by proxy reporter alleles and support the existence of a two-stem-cell model.

## RESULTS

### Comparative Analysis of Reporter Activity in Reserve and Active ISC Populations

To directly compare CBC ISCs, reserve ISCs, and putative reserve ISCs, we examined the spatial distribution of cells

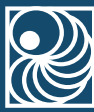

marked by *Lgr5-EGFP-IRES-CreERT2* (CBC marker; [Barker et al., 2007](#)), *Bmi1-CreERT2* (reserve ISC; [Sangiorgi and Capecchi, 2008](#); [Tian et al., 2011](#); [Yan et al., 2012](#)), *Hopx-CreERT2* (reserve ISC; [Takeda et al., 2011](#)), *Bmi1-EGFP* (putative reserve ISC; [Tian et al., 2011](#)), and *Hopx-EGFP* (putative reserve ISC; [Takeda et al., 2013](#)) in the proximal jejunum of mice that were maintained on a C57Bl/6 background and cohoused ([Figure S1](#) available online).

CBCs marked with *Lgr5-EGFP-IRES-CreERT2* exhibited a robust, crypt-localized signal that decreased rapidly into the early T/A zone, although not every crypt contained *Lgr5-EGFP*<sup>+</sup> cells, consistent with the known mosaic activity of this allele ([Figure 1A](#)). Activation of a *ROSA26-lox-stop-lox-tdTomato* reporter (referred to as *LSL-Tomato*) in *Lgr5-EGFP-IRES-CreERT2* mice by a single injection of tamoxifen (Tam) marked cells in a position and with a frequency consistent with that of *Lgr5-EGFP*<sup>+</sup> cells, indicating that, in this model, enhanced GFP (EGFP) correlates well with CreER activity ([Figure 1B](#)). This notion is supported by flow cytometric analysis of *EGFP*<sup>+</sup> and *Tomato*<sup>+</sup> populations. *Lgr5-EGFP*<sup>+</sup> cells comprised approximately 1.7% of the epithelial preparation, whereas the *Lgr5-LSLTomato*<sup>+</sup> population comprised 0.32%, consistent with some inefficiency in CreERT2 nuclear translocation and genomic recombination in response to Tam ([Figures 1C](#) and [1D](#)). All *Lgr5-Tomato*<sup>+</sup> cells were also *Lgr5-EGFP*<sup>+</sup>, confirming the correlation between these reporters and indicating that insufficient cell division occurs in the 18 hr lineage trace for *Tomato*<sup>+</sup> cells to generate daughters that have lost *EGFP*.

Putative reserve ISCs marked with *Bmi1-EGFP* were not reliably detectable by immunostaining; it was difficult to determine whether cells in the crypt were *Bmi1-EGFP*<sup>+</sup> over background ([Figure 1E](#)). In contrast, functional reserve ISCs marked by *Bmi1-CreERT2-LSL-Tomato* were observed as single cells within the crypt; however, this allele also frequently marked cells within the villi ([Figure 1F](#)). Approximately 1% of epithelial cells are marked by *Bmi1-CreERT2*, whereas nearly zero cells were detectable in *Bmi1-EGFP* small intestine ([Figures 1G](#) and [1H](#)). This finding highlights a discrepancy between *Bmi1-EGFP*- and *Bmi1-CreERT2*-marked populations.

We next examined the activity of *Hopx* knockin alleles. Consistent with published reports, *Hopx-CreERT2-LSL-Tomato* predominantly marked single cells above the crypt base, similar in location and frequency to those marked by *Bmi1-CreERT2* ([Figure 1J](#)). Unlike *Bmi1-CreERT2*, *Hopx-CreERT2* did not frequently mark cells outside of the crypt. In stark contrast to *Hopx-CreERT2*, analysis of *Hopx-EGFP*<sup>+</sup> revealed activity of this reporter throughout the crypt in the CBC, Paneth cell, and +4 zones ([Figure 1I](#)). In epithelial cells, 0.7% was marked by *Hopx-CreERT2* and 11% were marked by *Hopx-EGFP*<sup>+</sup> ([Figures 1K](#) and [1L](#)). This finding

again highlights discrepancies between the functionally validated *CreERT2* marker alleles and the *EGFP* reporters. These discrepancies may be due to the differing sites of integration of these reporters ([Figure S1](#)), the perdurance of EGFP in rapidly cycling cells, differences due to efficiency of CreERT2 target allele excision, or a combination of these factors. Our findings thus far call into question the validity of using the *EGFP* reporter alleles as proxies for functional reserve ISC identity defined by *Hopx*- and *Bmi1-CreERT2* activity.

### Cell-Cycling Dynamics in Active and Reserve Intestinal Stem Cells

CBCs cells are actively cycling, with estimates that they divide approximately daily ([Snippert et al., 2010](#)). In contrast, reserve ISCs are often referred to as being quiescent; however, published evidence for their quiescence does not exist. Given the recent study defining LRCs as secretory progenitor cells ([Buczacki et al., 2013](#)), we compared the dynamics of DNA synthesis between *Lgr5*+ CBCs and the reserve ISCs. We observed that, during the course of a 2 hr pulse labeling with 5-ethynyl-2'-deoxyuridine (EdU), approximately 40% of *Lgr5*+ cells underwent DNA synthesis ([Figures 2A](#), [2B](#), and [S2A](#)). In contrast, both *Bmi1*- and *Hopx-CreERT2*-marked populations had approximately 20% of cells synthesize DNA during the same period, with EdU+ reserve ISCs observed as single cells near the crypt base ([Figures 2A](#), [2B](#), and [S2A](#)). This result supports the rapidly cycling nature of CBCs but also indicates that reserve ISCs undergo DNA synthesis relatively frequently, likely too frequently to be label-retaining cells if they represent homogenous populations.

### Single-Cell Transcriptional Profiling Reveals Heterogeneity in Reporter-Marked ISC Populations

We next sought to understand the heterogeneity and molecular identity of ISCs both within and across the marked populations. We initially compared cells marked by reporter alleles that were functionally shown to mark ISCs. Single cells marked by *Tomato* expression (for *Bmi1*- and *Hopx-CreERT2*) or by EGFP (for *Lgr5*) were isolated from small intestinal crypt preparations (after removal of villi) by fluorescence-activated cell sorting (FACS) 18 hr after Tam induction and subjected to profiling on Fluidigm Biomark HD dynamic arrays. The transcript levels of 48 genes representing both components and targets of the Wnt and Notch pathways, ISC-related genes, and proliferation- and metabolism-related genes were analyzed in single cells with two distinct primer pairs per gene ([Figure S2B](#); [Tables S1](#), [S2](#), and [S3](#)).

Principal component analysis (PCA) of single cells within these populations revealed clear differences in the molecular identity of *Lgr5*<sup>+</sup> CBCs in comparison to the reserve ISCs

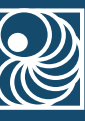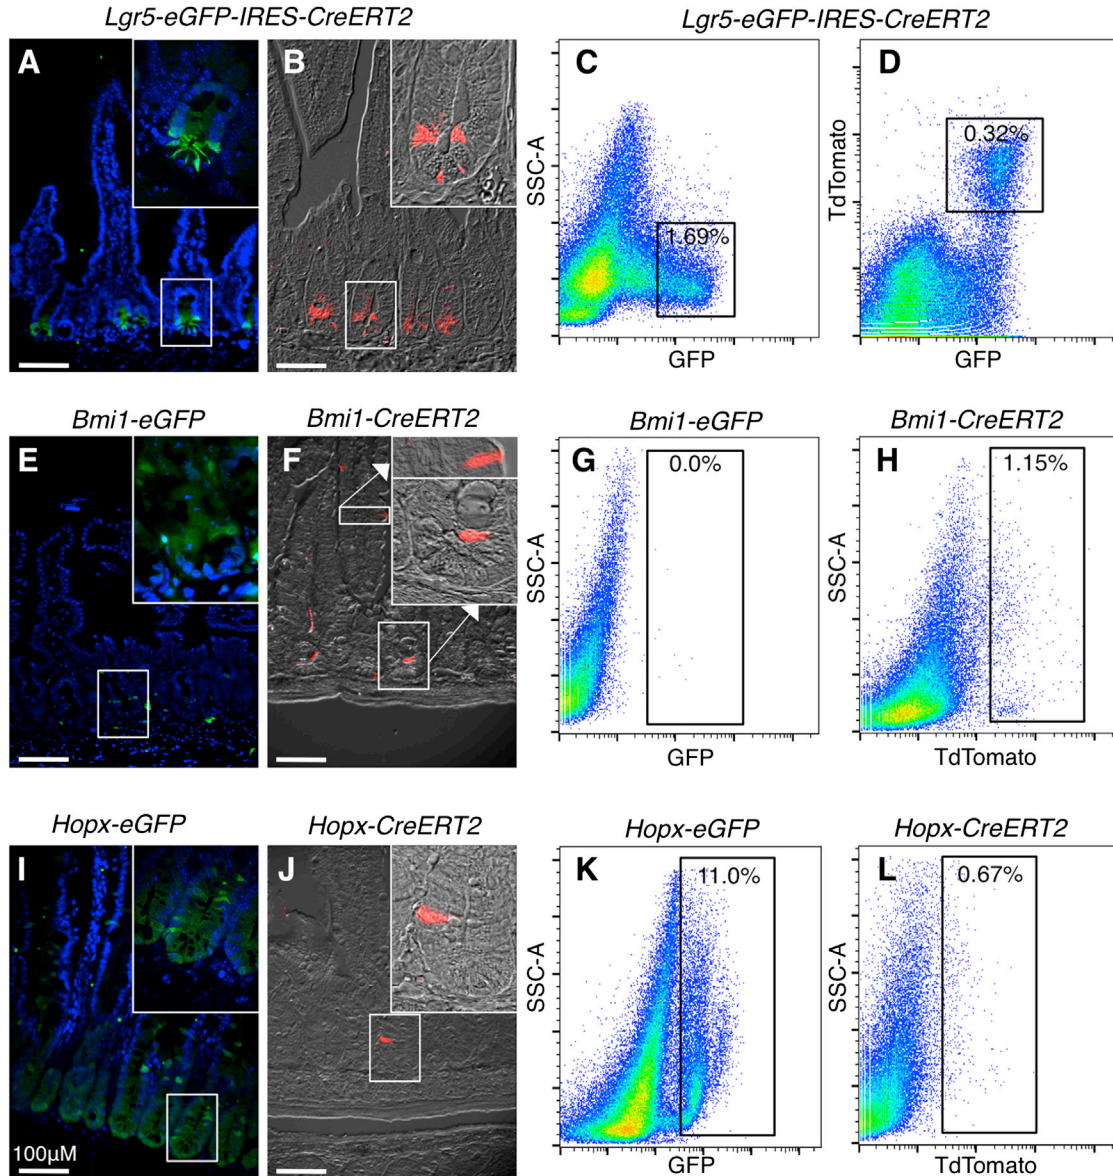

### Figure 1. Histological and Flow Cytometric Analysis of Intestinal Stem Cell Proxy Reporter Alleles

(A and B) Immunofluorescence detection of EGFP from the *Lgr5-EGFP-IRES-CreERT2* locus (A) or tdTomato from the *Lgr5-EGFP-IRES-CreERT2::LSL-tdTomato* reporter (B).

(C and D) Flow cytometric analysis of *Lgr5-EGFP* (C) or EGFP versus tdTomato in *Lgr5-EGFP-IRES-CreERT2::LSL-tdTomato*.

(E and F) Immunofluorescence detection of *Bmi1-EGFP* (E) or *Bmi1-CreERT2::LSL-tdTomato* (F).

(G and H) Flow cytometric analysis of *Bmi1-EGFP* (G) or *Bmi1-CreERT2::LSL-tdTomato* (H).

(I and J) Immunofluorescence detection of *Hopx-EGFP* (I) or *Hopx-CreERT2::LSL-tdTomato* (J).

(K and L) Flow cytometric analysis of *Hopx-EGFP* (K) or *Hopx-CreERT2::LSL-tdTomato* (L).

All tdTomato immunofluorescence was performed 24 hr after a single dose of Tam. All tdTomato flow cytometry was performed 18 hr after a single dose of Tam (n = 3 independent experiments per allele). See also [Figure S1](#).

([Figure 2C](#)). PCA plots of these same populations annotated by experiment number rather than reporter identity revealed no experimental bias across three distinct epithelial preparations that were independently isolated, sorted,

amplified, and analyzed ([Figure S2C](#)). Interestingly, analysis of housekeeping genes *Gapdh* and *Gusb* ([Wang et al., 2010](#)) revealed significant differences in their expression, both between individual cells within a group and between

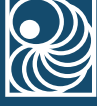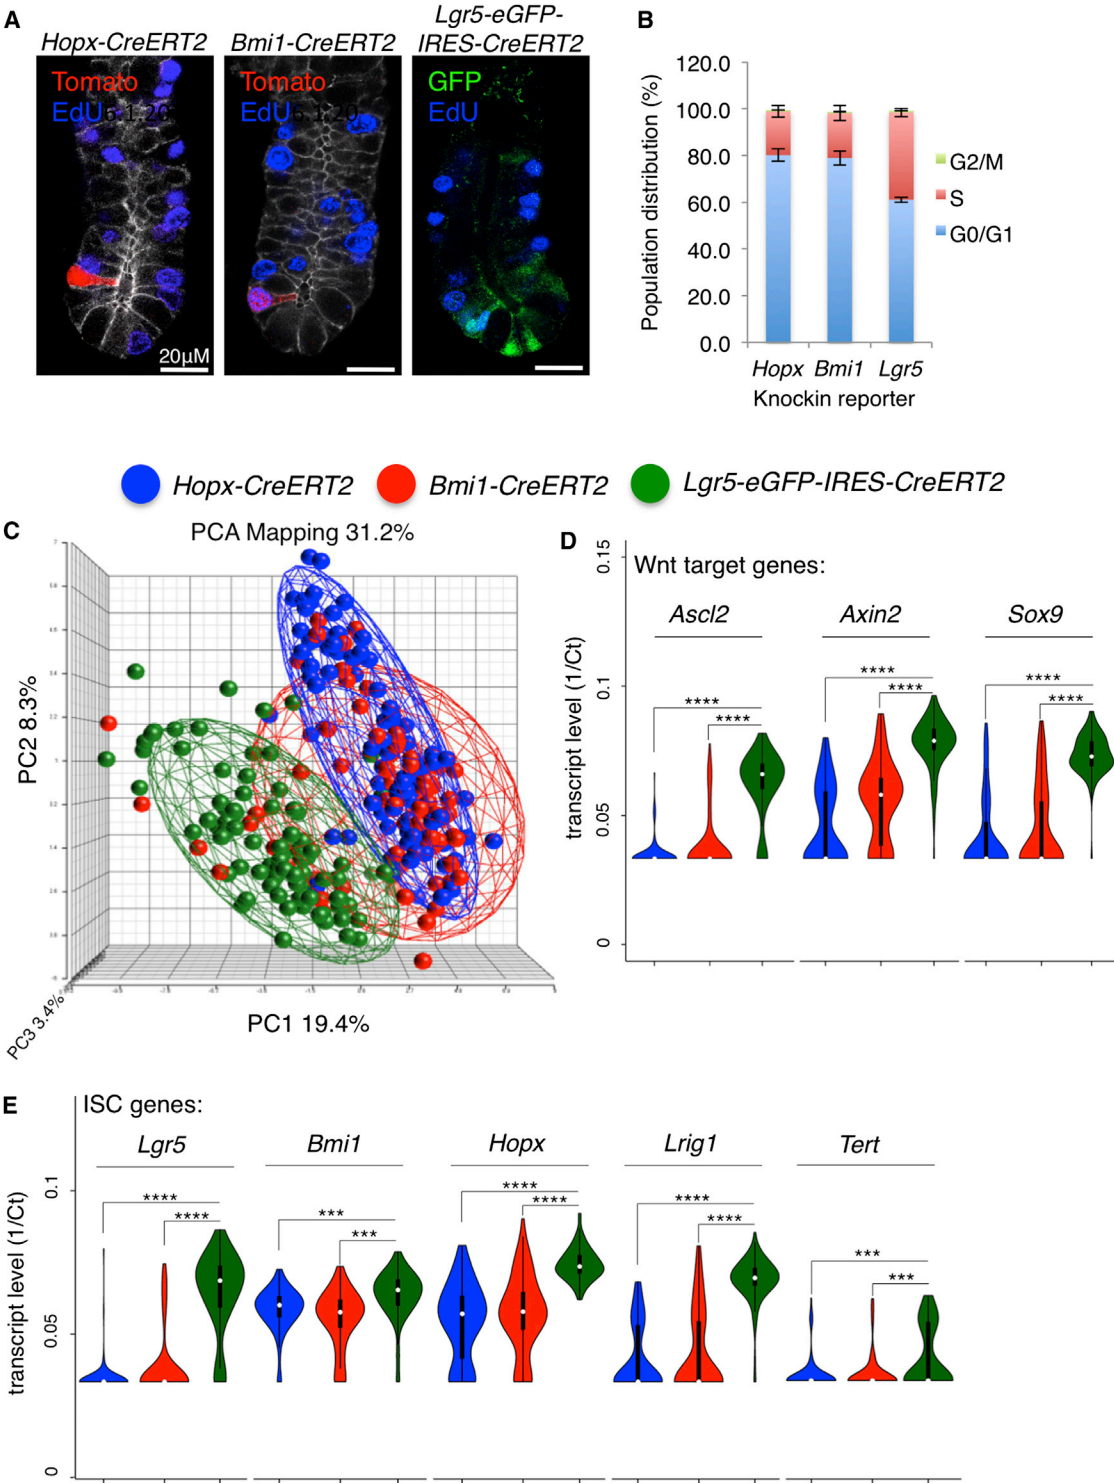

**Figure 2. Single-Cell Analysis of ISC Proliferation and Gene Expression**  
(A) Immunofluorescence costaining for proliferative cells marked by a 2 hr pulse of EdU along with Tomato in *Bmi1*- and *Hopx*-*CreERT2* crypts or EGFP in *Lgr5*-EGFP crypts.  
(B) Quantification of cell-cycle distribution in the ISC marker models shown in (A) (n = 3 independent experiments; ±SD).

(legend continued on next page)

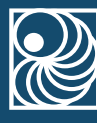

groups, indicating that normalization of RNA quantification to expression of these genes can introduce bias (Figure S2D).

A number of *Bmi1-CreERT2*<sup>+</sup> cells exhibited a “CBC-like” identity in the PCA, possibly reflecting the transition of these cells from the reserve state to an active CBC state (Figure 2C). This was observed less frequently in *Hopx-CreERT2*<sup>+</sup> cells (Figure 2C). Calculations of the coefficient of variation (CV) in gene expression across individual cells in these two populations further reveals that the *Hopx-CreERT2*<sup>+</sup> cells represent a more homogenous population than *Bmi1-CreERT2*<sup>+</sup> (mean CV% = 13.61 and 14.84, respectively). Consistent with this notion, fewer *Hopx-CreERT2*<sup>+</sup> cells expressed Wnt target genes whose expression characterizes the CBC state in comparison to *Bmi1-CreERT2*<sup>+</sup> cells (including *Ascl2*, *Axin2*, *Sox9*, and *Lgr5*; Figures 2C and 2D). It is important to highlight here that the *Hopx*- and *Bmi1-CreERT2*<sup>+</sup> cells that we profiled were derived from crypt preparations, and thus, the *Bmi1-CreERT2*<sup>+</sup>-marked cells within the villi (Figure 1F) were excluded in the analysis.

Examination of ISC-related genes including *Lgr5*, *Bmi1*, *Hopx*, *Lrig1*, and *Tert* revealed that all of these genes are expressed at higher levels in *Lgr5-EGFP*<sup>+</sup> cells than in the reserve ISC populations. Whereas the endogenous putative reserve ISC transcripts *Bmi1* and *Hopx* were highly expressed relative to *Lgr5* and other Wnt signature genes in *Hopx*- and *Bmi1-CreERT2*<sup>+</sup> cells, their expression was higher still in *Lgr5-EGFP*<sup>+</sup> cells (Figures 2D and 2E). This finding supports prior bulk transcriptome profiling of *Lgr5-EGFP*<sup>+</sup> cells and in situ hybridization studies (Itzkovitz et al., 2012; Muñoz et al., 2012) and highlights the discrepancy between *Hopx*- and *Bmi1-CreERT2*<sup>+</sup> reporter activity and the levels of endogenous *Hopx* and *Bmi1* transcripts. This also demonstrates that the presence of high levels of *Hopx* or *Bmi1* mRNA is not only a poor indicator of reserve ISC identity but in fact is more indicative of the CBC state. Further, this result reconciles contradictions in the literature suggesting that the CBC and reserve ISCs represent the same population based on expression of *Bmi1* and *Hopx* in *Lgr5*<sup>+</sup> cells. We conclude that the use of endogenous *Bmi1* or *Hopx* mRNA as evidence for reserve intestinal stem cell identity is invalid.

Similar to canonical Wnt target genes, Notch target genes such as *Hes1* and *Olfm4* were also preferentially expressed in *Lgr5-EGFP*<sup>+</sup> cells in comparison to reserve ISCs (Figure S3A). Further, the master secretory cell fate determinant

*Atoh1* (*Math1*) appeared consistent across the three ISC populations, further suggesting that the secretory progenitor population may be a distinct pool of cells not profiled in this assay.

We next asked which differentially expressed genes were the best predictors of reserve ISC identity (*Hopx-CreERT2*<sup>+</sup> or *Bmi1-CreERT2*<sup>+</sup>) versus CBC identity (*Lgr5-EGFP*<sup>+</sup>). We found that low expression of Wnt and cell-cycle-related genes *Ccnd1*, *Myc*, *Myb*, and *Lgr5* along with high expression of *Cdkn1a* (encoding p21) and *Cubn* (encoding a vitamin B12 receptor) best predict reserve stem cell versus active CBC stem cell identity (Figure S3B; not shown). This finding is not surprising given the dependence of CBCs on high canonical Wnt pathway activity and their rapidly cycling state relative to the reserve ISCs.

### Fidelity of EGFP Reporters Relative to CreERT2 Reporters

Having established the heterogeneity and identity of cells within the *Hopx*- and *Bmi1-CreERT2*<sup>+</sup> populations versus *Lgr5*<sup>+</sup> CBCs, we next compared these populations to their counterparts marked by *EGFP* insertions. This is an important comparison, as functional studies such as lineage tracing and diphtheria-toxin-based cell ablation have only been carried out using *CreERT2* alleles, yet the activity of their *EGFP* counterparts is often used as proxy evidence for stem cell identity. We initially examined the profiles of cells marked by *EGFP* versus *Tomato* in *Lgr5-EGFP-IRES-CreERT2::LSL-Tomato* mice and found that these populations were largely overlapping in PCA plots (Figure S3C). This is consistent with our flow cytometric profiling, demonstrating that the *Tomato*<sup>+</sup> population marked a subset of *EGFP*<sup>+</sup> cells (Figure 1D). Interestingly, there was less variation in the *Tomato*<sup>+</sup> population than the *EGFP*<sup>+</sup> population, likely due to the perdurance of *EGFP* into the previously described “*Lgr5*-mid/low” state in which CBCs begin committing to differentiation (Merlos-Suárez et al., 2011). Thus, there is good correlation between the activity of the *CreER* and *EGFP* reporters in the *Lgr5* locus.

Detection of *Bmi1-EGFP*<sup>+</sup> in the proximal small intestine was difficult; however, we attempted to collect enough *Bmi1-EGFP*<sup>+</sup> cells to perform single-cell profiling. Profiling of *Bmi1-EGFP*<sup>+</sup> revealed that many of the sorted cells were either debris or gave highly inconsistent signatures, with no clear cellular identity (Figure S3D). There are several potential explanations for this result, including the

(C) Principal component analysis (PCA) of single-cell mRNA profiles generated from *Bmi1-CreER*, *Hopx-CreER*, and *Lgr5-EGFP* cells isolated from small intestinal crypts.

(D) Violin plots showing transcript levels of canonical Wnt target genes in individual cells plotted in (C).

(E) Violin plots showing transcript levels of putative ISC-marker genes in individual cells plotted in (C) ( $n = 93$ , *Bmi1-CreERT2*;  $n = 93$ , *Lgr5-EGFP*;  $n = 91$ , *Hopx-CreERT2*). Two-sided t test; \*\*\*\* $p < 1 \times 10^{-10}$ ; \*\*\* $p < 1 \times 10^{-4}$ .

See also Figures S2 and S3.

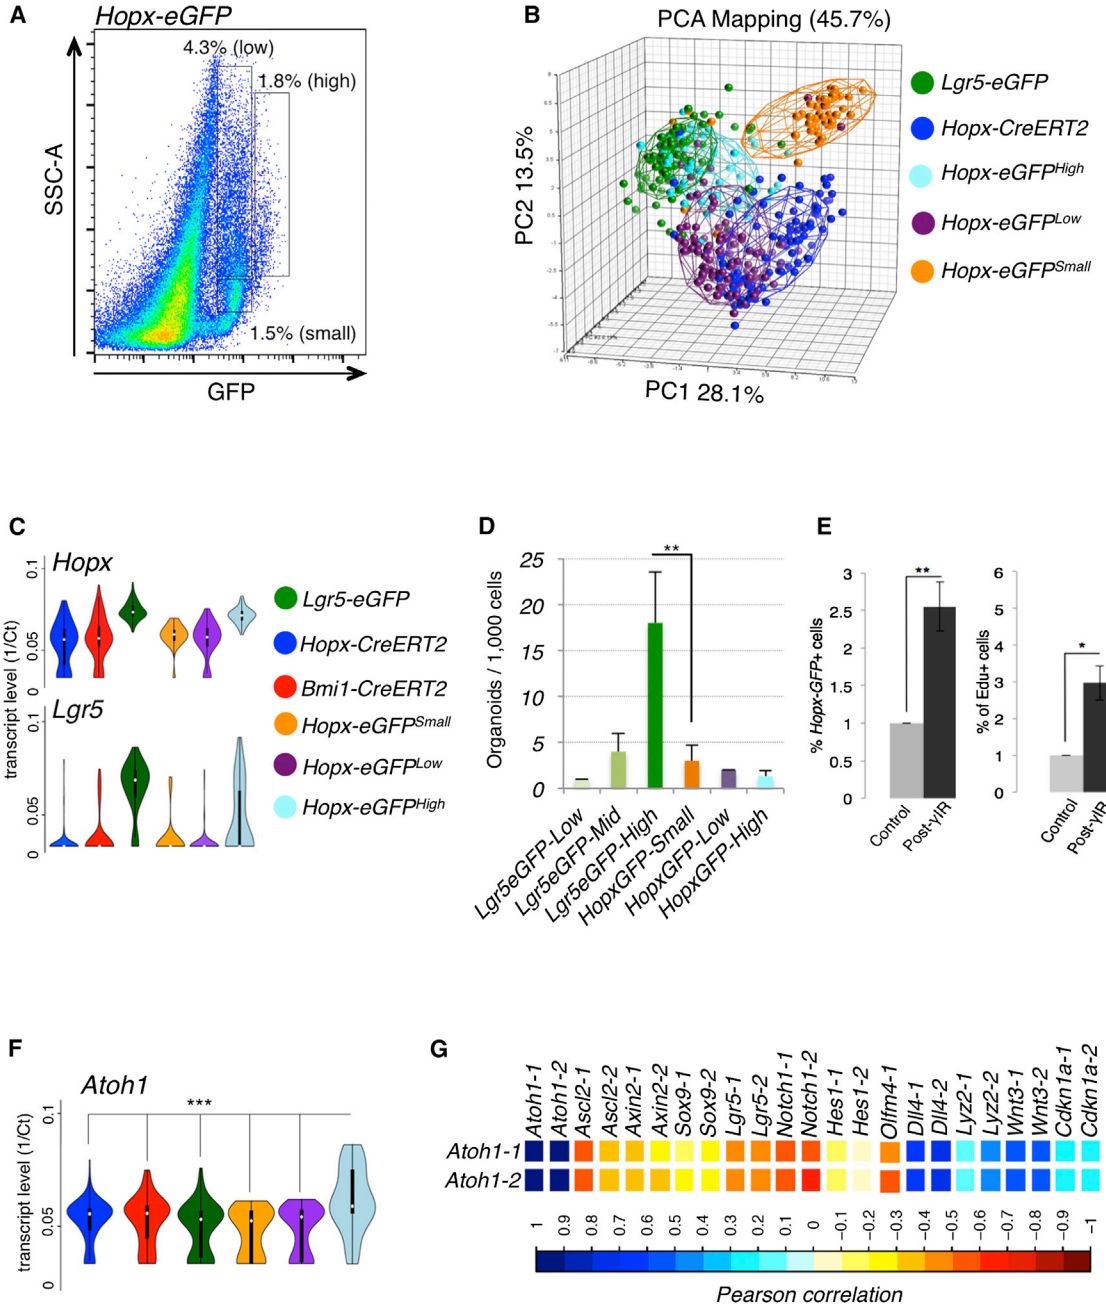

**Figure 3. Characterization of Hopx-EGFP-Marked Cells**

(A) FACS gating strategy separating the Hopx-EGFP<sup>+</sup> population into Hopx-EGFP<sup>High</sup> (n = 48), <sup>Low</sup> (n = 94), and <sup>Small</sup> (low side scatter; n = 47) subgroups.  
 (B) PCA plots of populations shown in (A) in comparison to Lgr5-EGFP- and Hopx-CreERT2-marked cells.  
 (C) Hopx and Lgr5 expression across the Hopx-EGFP populations in comparison to Lgr5-EGFP-, Bmi1-CreERT2-, and Hopx-CreERT2-marked cells (as shown in Figure 2E and provided here as reference).  
 (D) In vitro intestinal organoid formation efficiencies from single cells from Hopx-EGFP populations in comparison to Lgr5-EGFP-High, Medium, and Low populations.  
 (E) Flow cytometric quantification of total Hopx-EGFP<sup>+</sup> cell frequency (left panel) and frequency of actively proliferating Hopx-EGFP<sup>+</sup> cells in control mice and mice treated with 12 Gy  $\gamma$ -IR and quantified 48 hr later. For (D) and (E), n = 3 independent experiments,  $\pm$ SD, \*p < 0.1, and \*\*p < 0.01.

(legend continued on next page)



possibility that the few *Bmi1-EGFP*<sup>+</sup> cells we were able to collect were not bona fide reserve ISCs or that the excessive sort time required to collect these cells resulted in RNA degradation and sorting errors. Thus, histological, flow cytometric, and single-cell gene-expression profiling indicate that there are discrepancies between the activity of the *Bmi1-CreER* and the *Bmi1-EGFP* alleles, and such *Bmi1-EGFP*<sup>+</sup> cells may not represent bona fide reserve intestinal stem cells.

In contrast, the *Hopx-EGFP* allele was active throughout the crypt (Figures 1I and 1K). To better understand the populations marked by *Hopx-EGFP*, we separated *Hopx-EGFP*<sup>+</sup> cells into three distinct gates for sorting and profiling. These include an *EGFP*<sup>High</sup> population, an *EGFP*<sup>Low</sup> population, and an *EGFP*<sup>Low</sup> population with a low degree of side scatter (low complexity; designated *Hopx-EGFP*<sup>Small</sup>; Figure 3A). PCA indicated that these populations were largely distinct, with some overlap between the *Hopx-EGFP*<sup>High</sup> cells and the *Lgr5-EGFP*<sup>+</sup> population and between the *Hopx-EGFP*<sup>Low</sup> cells and the *Hopx-CreERT2*<sup>+</sup> population (Figures 3B and S4A). Overall, the *Hopx-EGFP*<sup>+</sup> populations had varying expression of *Hopx*, low expression of *Lgr5* and Wnt pathway genes, and formed intestinal organoids from single cells in vitro with an efficiency significantly lower than *Lgr5-EGFP*<sup>High</sup> cells but comparable to *Lgr5-EGFP*<sup>Mid</sup> cells, demonstrating that stem cell potential exists within this population (Figures 3C and 3D; not shown).

We also examined how *Hopx-EGFP*<sup>+</sup> cells respond to injury after irradiation. A 12 Gy dose of  $\gamma$ -IR is sufficient to quantitatively ablate *Lgr5*<sup>+</sup> CBCs (Yan et al., 2012). Within 2–4 days after  $\gamma$ -IR, surviving reserve ISCs begin actively proliferating, with *Lgr5*<sup>+</sup> cells arising shortly thereafter (Yan et al., 2012). We administered 12 Gy  $\gamma$ -IR to *Hopx-EGFP*<sup>+</sup> mice and observed a significant increase in both the frequency and proliferative rate of *Hopx-EGFP*<sup>+</sup> cells 2 days after  $\gamma$ -IR relative to nonirradiated controls (Figure 3E), providing evidence that a subset of the *Hopx-EGFP*<sup>+</sup> population contains a radioresistant cell capable of surviving and proliferating in response to high-dose  $\gamma$ -IR, properties consistent with a reserve ISC.

Given that *Hopx-EGFP*<sup>+</sup> cells labeled nearly all cells at the base of crypts (Figure 1I), we reasoned that Paneth cells should also be contained in one of the *Hopx-EGFP*<sup>+</sup> subpopulations. Indeed, c-Kit<sup>+</sup>, CD24<sup>+</sup> Paneth cells were observed in the *Hopx-EGFP*<sup>+</sup> population, and these cells constituted a large fraction of the *Hopx-EGFP*<sup>High</sup> population (Figure S4B). These findings provide clear evidence that *Hopx-CreER* and *Hopx-EGFP* mark different cell populations and thus do not

support the use of *Hopx-EGFP* as a surrogate marker for reserve ISCs.

### Identification of the Secretory Precursor Cell Molecular Signature

Several recent studies have identified secretory precursor cells with seemingly disparate properties. One study identified LRCs with very high *Lgr5* expression as precursors of the intestinal secretory lineages (Buczacki et al., 2013). Because these cells were found to be slow cycling, it was posited that the reserve ISCs marked by *Bmi1-CreERT2* may in fact represent these secretory precursors rather than a distinct, general reserve ISC. Our cell-cycle analysis suggests that *Bmi1-CreERT2* likely cycle too frequently to be LRCs, and our single-cell profiling of the *Bmi1-CreERT2* cells revealed that they express little to no *Lgr5*, indicating that they are not label-retaining secretory precursors. Further, numerous published studies have demonstrated that reserve ISCs (marked either by *Bmi1*- or *Hopx-CreERT2*) act as stem cells during homeostasis and generate all cell types of the intestinal epithelium, not only secretory lineages. Thus, our study and numerous published reports provide compelling evidence that the reserve ISCs are both functionally and molecularly distinct from label-retaining secretory precursor cells.

Another independent study identified a distinct population of secretory precursors through the use of *Dll* knockin reporter alleles (van Es et al., 2012). In contrast to the LRCs, the *Dll*<sup>+</sup> secretory precursors exhibited a very specific gene-expression pattern with high expression of genes encoding Notch ligands (*Dll*), low levels of *Notch* receptors and Notch pathway target genes (*Hes*), and very high levels of *Atoh1* (*Math1*; van Es et al., 2012). Unlike the label-retaining precursors, these cells also exhibit very low levels of canonical Wnt target genes including *Lgr5*. We therefore searched for cells with patterns of anticorrelation between *Atoh1* and the Notch/Wnt pathway (*Atoh1*<sup>High</sup>, *Notch*<sup>Low</sup>, *Wnt*<sup>Low</sup>, and *Dll*<sup>High</sup>) within the various populations. Correlation matrices between genes across all of the populations (Table S4) revealed the expected anticorrelation only within the *Hopx-EGFP*<sup>High</sup> group. This group had the largest population of *Atoh1*<sup>High</sup> cells relative to all other groups (Figure 3F), and the *Hopx-EGFP*<sup>High</sup> cells exhibited significant anticorrelation between *Atoh1* expression and that of Wnt target genes including *Ascl2* and *Lgr5*, as well as Notch pathway genes *Notch1*, *Hes1*, and *Olfm4* (Figures 3G and S4C). Further, there was a significant positive correlation between *Atoh1* and the Notch ligand *Dll4* in this population

(F) *Atoh1* transcript levels in single cells across the populations shown in (B). \*\*\*p < 0.0005 for difference in mean expression of *Atoh1* in *Hopx-EGFP*<sup>High</sup> cells versus any other population, Two-sided t test.

(G) Pearson correlation matrix between expression of *Atoh1* and transcripts characteristic of secretory progenitor cells.

See also Figure S4.





(Figure 3G), consistent with the lateral inhibition model of Notch signaling and the previously established secretory precursor cell molecular signature. These molecular correlations were not significantly observed in the functional reserve ISC populations, in the *Lgr5-EGFP*<sup>+</sup> population, or other *Hopx-EGFP* populations (Table S4). Thus, our findings strongly suggest that the *Dll1*<sup>+</sup> secretory progenitor cells exist as a subpopulation within the *Hopx-EGFP*<sup>High</sup> population and are distinct from the functionally validated *Bmi1*- and *Hopx-CreERT2*-marked reserve ISCs.

### Examining the Functional Capacity of Active and Reserve Intestinal Stem Cells

Tam-induced lineage tracing initiated by *Lgr5*-, *Hopx*-, or *Bmi1-CreERT2* demonstrated that these populations are all capable of producing all of the functional cell types of the intestine; however, the frequency and dynamics with which they self-renew produce other ISC types, produce non-stem cell progeny, or undergo exhaustion is poorly understood. We therefore set out to compare the proliferative output of CBCs and reserve ISCs during intestinal homeostasis. To study the reserve ISC behavior, we chose to use the *Hopx-CreERT2* allele rather than the *Bmi1-CreERT2* because *Hopx-CreERT2* did not label differentiated cells in the villi and the *Hopx-CreERT2*<sup>+</sup> population was more homogenous than the *Bmi1-CreERT2*<sup>+</sup> population based on its lower coefficient of variation (Figure S5A).

Our experimental strategy was to initiate tracing from *Hopx-CreERT2* or *Lgr5-CreERT2* with a single Tam dose on the *LSL-Tomato* background and then collect and profile progeny produced 4 and 7 days later (Figure S5B). We initiated activation of the Tomato reporter in *Hopx-CreERT2*<sup>+</sup> mice and assessed clonal expansion. Figure 1J shows the first histologically detectable Tomato<sup>+</sup> cells 24 hr after Tam treatment as single cells within crypts. Four days after Tam, *Hopx-CreERT2*<sup>+</sup> progeny consisted primarily of small clusters of one to four cells in the crypts or around the crypt-villus junction, and 7 days later, some of these clusters had gone on to label a ribbon of differentiated cells in the villi (Figures 4A and S5C). In contrast, the proliferative output from *Lgr5-CreERT2* was more rapid and robust. Four days after initiating labeling, *Lgr5* progeny had already encompassed the entire crypt-villus axis (Figure 4B).

Whereas the proliferative dynamics of *Lgr5*<sup>+</sup> CBCs have been extensively characterized (Snippert et al., 2010), analogous studies on reserve ISC populations are lacking. To begin understanding these dynamics, we crossed a doxycycline (dox)-inducible *H2B-GFP* allele (*TRE-H2BGFP*) into the *Hopx-CreERT2-LSL-Tomato* reporter mice and maintained these mice on dox for 6 weeks, starting at postnatal day 14 in order to fully label nuclei with GFP. We then withdrew dox and simultaneously initiated Tomato tracing (Fig-

ures 4C and S5B), enabling us to gauge the amount of cell division that has occurred in daughter cells emanating from the *Hopx-CreERT2* reserve ISC by monitoring loss of H2B-GFP. Four days after initiating tracing, we observed that the *Hopx-CreERT2* progeny had undergone limited cell division compared to the bulk (Tomato<sup>-</sup>) population and could be divided into two populations of H2B-GFP intensity (Figures 4D and S5D). One week after initiation of the lineage trace, a subpopulation of Tomato<sup>+</sup> cells had undergone sufficient divisions to lose their H2B-GFP label; however, the progeny of the *Hopx-CreERT2* ISC still retained more H2B-GFP than the Tomato<sup>-</sup> population, consistent with these cells cycling slower than CBCs (Figures 4D and 4E).

To understand what cell-fate decisions the reserve ISC makes in its initial divisions, we separated *Hopx-CreERT2* progeny into two populations 4 days after initiation of lineage tracing: an H2B-GFP<sup>High</sup> and H2B-GFP<sup>Low</sup> population (Figure S5D). These were then subjected to single-cell profiling. Remarkably, PCA shows a clear division of cellular identity between these two groups: the H2B-GFP<sup>High</sup> population retained a reserve ISC identity, whereas the cells that had divided (H2B-GFP<sup>Low</sup>) primarily exhibited an *Lgr5*<sup>+</sup> CBC identity (Figures 4F and S5E). This indicates that, in their earliest cell-fate decision, reserve ISCs give rise to *Lgr5*<sup>+</sup> CBCs, providing molecular evidence to support prior histological observations that cells traced from *Bmi1*- or *Hopx-CreERT2* give rise to *Lgr5*<sup>+</sup> cells (Li and Clevers, 2010; Takeda et al., 2011; Tian et al., 2011).

We next compared the proliferative output of reserve ISCs to actively cycling CBCs 7 days after initiation of tracing. Because of the complexity of this population, we developed a mathematical model of stem cell identity based on the initial *HopxCreERT2-Tomato*<sup>+</sup> and *Lgr5-EGFP*<sup>+</sup> populations discussed above. We used these populations as references to train an algorithm to build an idealized reserve versus CBC ISC molecular identity and then retrospectively asked how many of the cells in these reference populations fit the mathematically idealized identities. The vast majority of *Hopx-CreERT2*<sup>+</sup> cells at day 0 exhibited a reserve ISC identity, with only a few cells being categorized as CBC-like or “other” (i.e., differentiated or T/A cells; Figures 5A and 5E). Similarly, the vast majority of *Lgr5-EGFP*<sup>+</sup> cells at day 0 were categorized as CBC-like, with only two cells in this group being identified as reserve ISCs (Figures 5B and 5E). To further examine the fidelity of the algorithm, we interrogated *Bmi1-CreERT2*<sup>+</sup> cells at day 0 and found that this population contained more CBC-like cells than the *Hopx-CreERT2*<sup>+</sup> population but fewer than the *Lgr5-EGFP*<sup>+</sup> population, as well as a slight increase in the number of cells that fall into neither category (Figure S6A). This is exactly what would be expected given the physical distribution of *Bmi1-CreERT2*<sup>+</sup> cells, their PCA clustering, and the

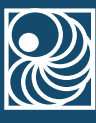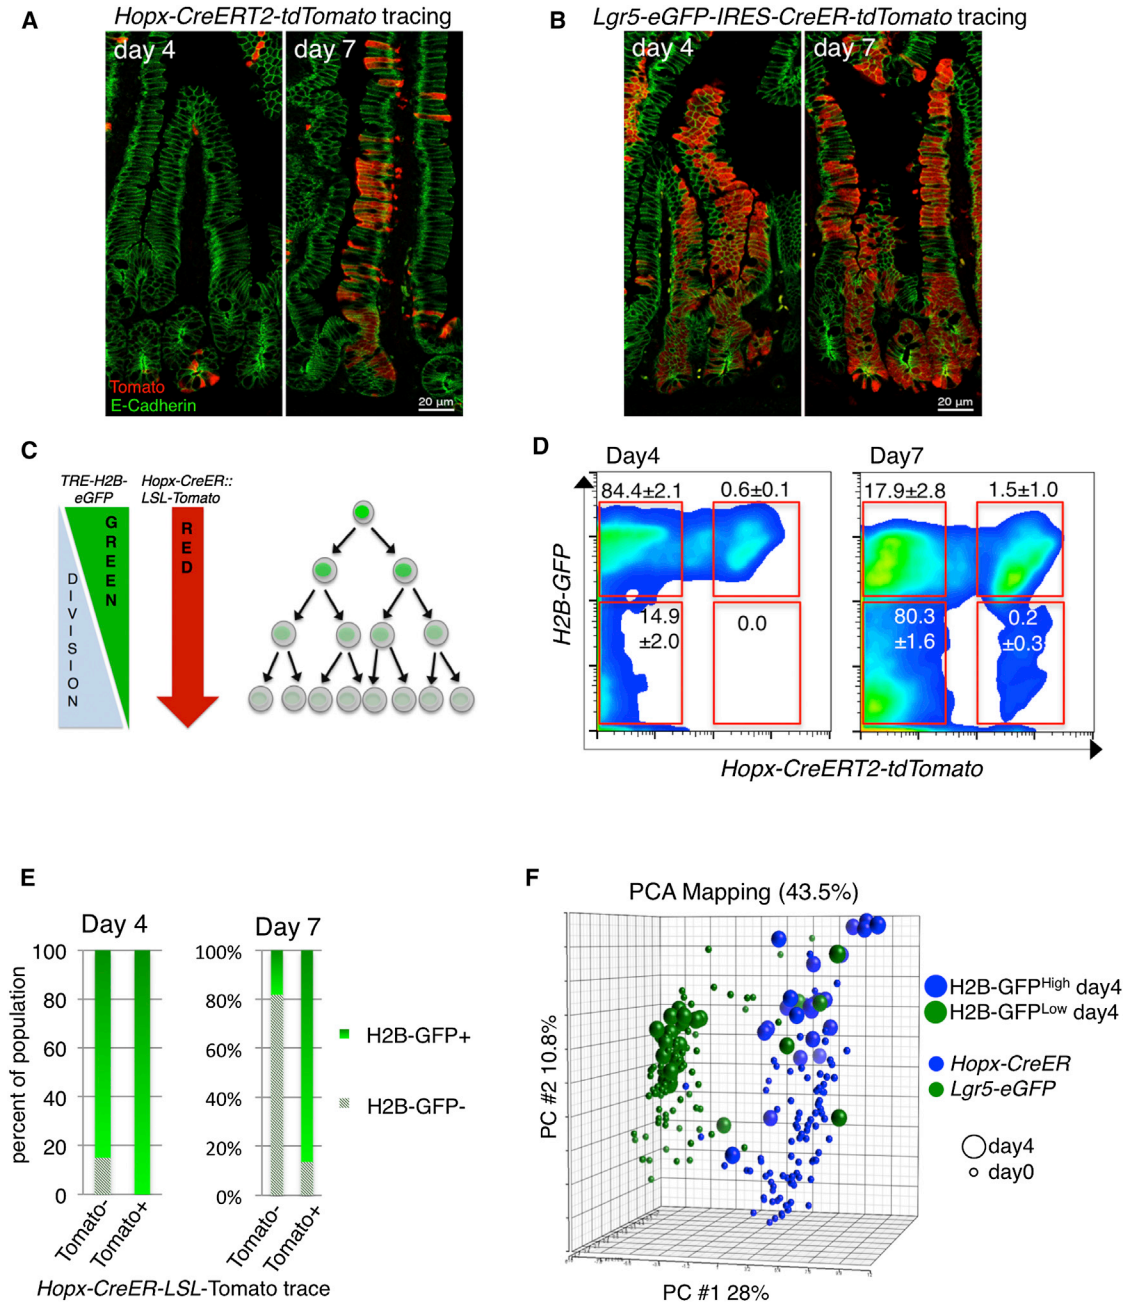**Figure 4. Defining the Proliferative Output of Reserve ISCs**

(A and B) Lineage tracing from *Hopx-CreERT2* (A) and *Lgr5-CreERT2* (B) 4 and 7 days after activation of the *LSL-tdTomato* reporter.

(C) Lineage-tracing strategy from *Hopx-CreERT2* while simultaneously monitoring cell division through loss of the H2B-GFP label.

(D) Flow cytometric analysis of proliferation in the intestinal epithelium (through loss of H2B-GFP label) relative to *HopxCre-tdTomato* lineage tracing at 4 and 7 days post-Tomato activation and H2B-GFP chase ( $n = 3$  independent experiments;  $\pm$ SD).

(E) Quantification of H2B-GFP loss in progeny of *Hopx-CreERT2* cells (Tomato<sup>+</sup>) versus bulk epithelium (Tomato<sup>-</sup>) as in (D).

(F) PCA plot of single cells derived from *Hopx-CreERT2* reserve ISCs (Tomato<sup>+</sup>) that have either not undergone cell division (H2B-GFP<sup>High</sup>;  $n = 48$ ) or have divided (H2B-GFP<sup>Low</sup>;  $n = 48$ ). Parental *Hopx-CreERT2* cells and *Lgr5-EGFP* cells are those shown in Figure 2 and included in the plot for reference.

See also Figure S5.

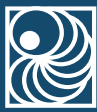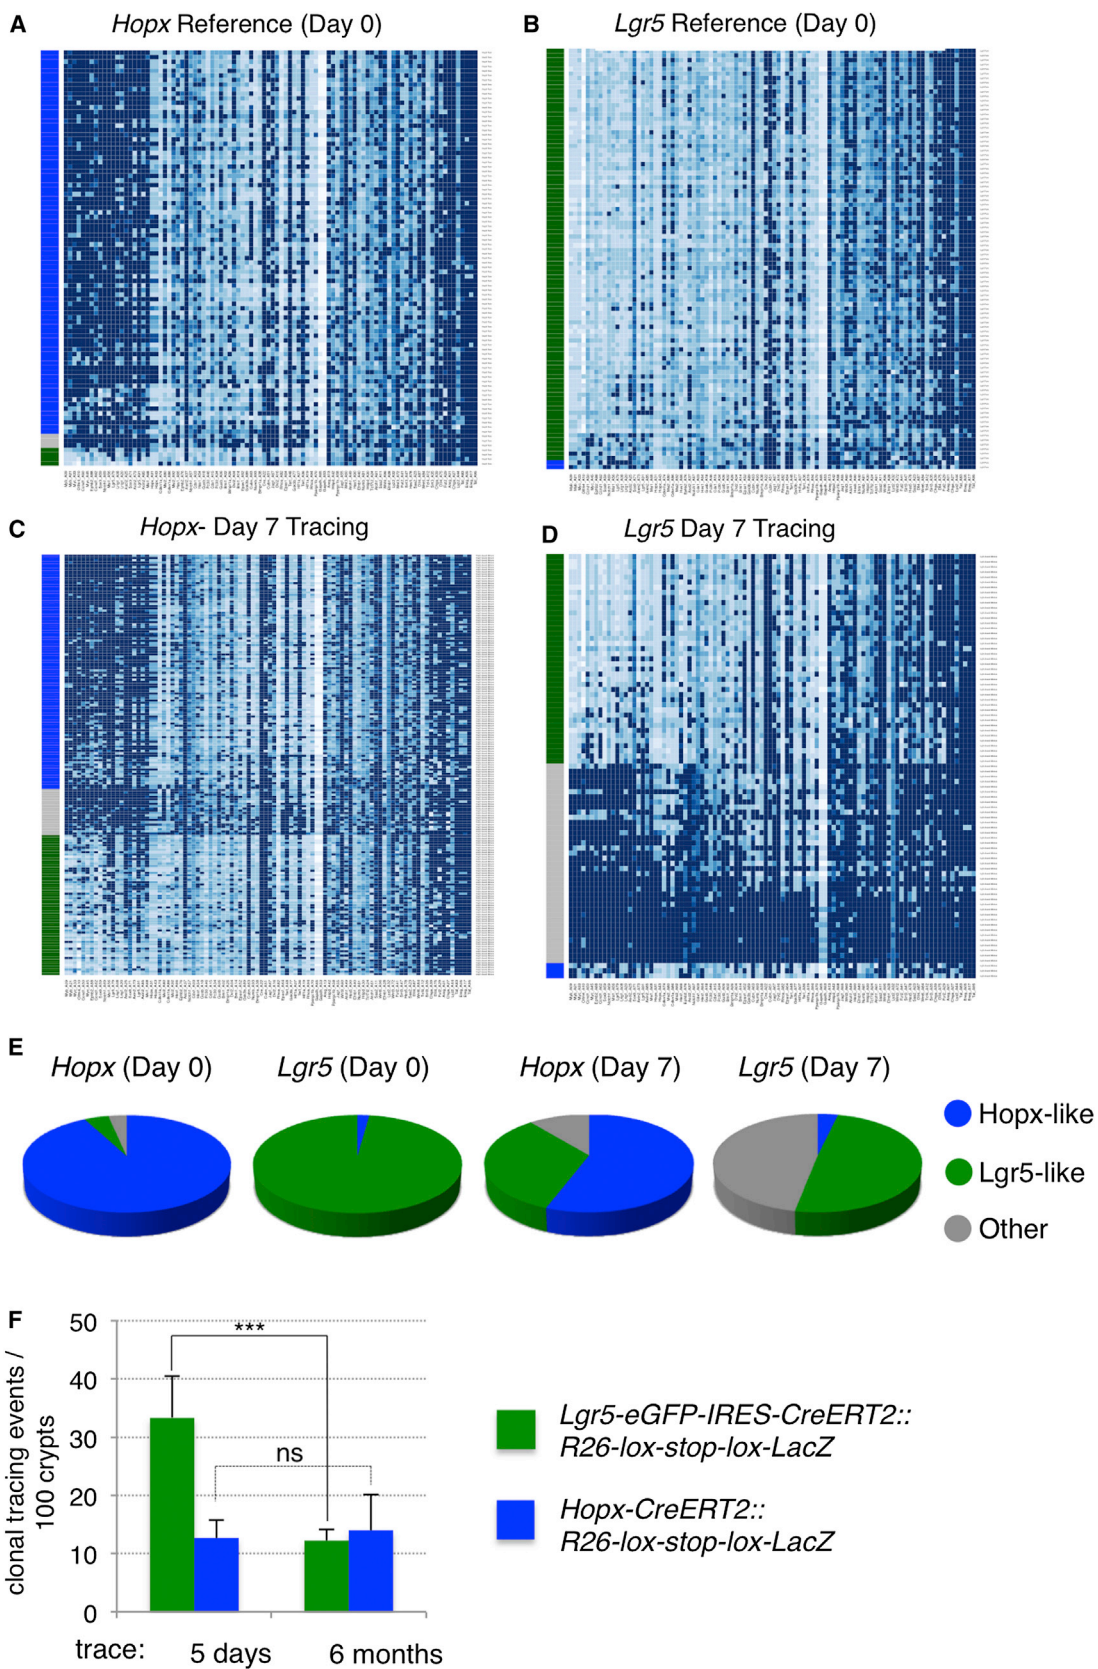

(legend on next page)



frequency of cells expressing the canonical Wnt/CBC signature genes in the *Bmi1-CreERT2*<sup>+</sup> population relative to the other populations.

One week after initiation of the lineage trace, *Hopx-CreERT2* progeny generated primarily more reserve ISCs as well as CBC-like cells and a small percentage of differentiated other cells (Figures 5C and 5E). In contrast, *Lgr5-CreERT2* gave rise primarily to differentiated progeny (other), followed by CBC cells, with no discernable increase in the fraction of reserve ISCs (Figures 5D and 5E). Taken together, these findings provide compelling evidence that, under homeostatic conditions, reserve ISCs either self-renew or generate CBCs upon dividing. In contrast, CBCs self-renew and generate the differentiated progeny necessary for tissue function. We find no evidence that CBCs give rise to reserve ISCs with any appreciable frequency under homeostatic conditions, although we cannot rule out that such conversion occurs at low frequency or in response to tissue damage.

Given our observations that *Hopx-CreERT2* cells give rise to *Lgr5*<sup>+</sup> CBCs in their initial divisions and that *Hopx-CreERT2* clones are long-lived, generating all cell types of the epithelium for up to 1 year (Takeda et al., 2011), one would predict that this would either result in a net accumulation of *Lgr5*<sup>+</sup> CBCs over time if these cells are equally long-lived or that *Lgr5*<sup>+</sup> CBCs undergo loss over time necessitating replacement. To address this, we analyzed extinction of lineage-tracing events in clones derived from either *Lgr5-CreERT2::R26-LSL-LacZ* mice or *Hopx-CreERT2::R26-LSL-LacZ* mice shortly after initiation of tracing with a single Tam dose (5 days) and after a 6-month chase period (Takeda et al., 2011). Interestingly, *Lgr5-CreER*-derived clones exhibited significant clonal extinction, with approximately a 75% reduction in the number of clones persisting over the 6-month chase period (Figures 5F and S6B). In contrast, the frequency of *Hopx-CreER*-derived clones remained constant over the same time course. This finding highlights differences in proliferative output of these two ISC types, with reserve ISC clones maintaining clonal proliferative output significantly longer than active ISCs.

### Hierarchical Model of Intestinal Cells Marked by ISC Proxy Knockin Marker Alleles

In order to compare populations marked by the knockin proxy reporter alleles shown in Figure S1, we performed un-

supervised hierarchical clustering of all cells profiled in this study (Figure 6A). As expected, the bulk of *Lgr5*<sup>+</sup> CBCs comprise one end of the hierarchy, and the reserve *Hopx-CreERT2*-marked ISCs comprise the other end of the spectrum. *Bmi1-CreERT2*-marked reserve ISCs tend to cluster with *Hopx-CreERT2* cells, with the exception of the few cells that have a CBC identity. *Hopx-EGFP*<sup>low</sup> cells cluster near the reserve ISCs, and *Hopx-EGFP*<sup>high</sup> and *Hopx-EGFP*<sup>small</sup> cells generally fall into distinct clusters between the two extremes of the spectrum. Interestingly, a small subset of cells from all of these groups falls into the CBC cluster, indicative of the heterogeneity within these populations (Figure 6A).

## DISCUSSION

The characterization of ISC populations by histological and bulk molecular profiling approaches has resulted in a number of seemingly contradictory findings in the published literature. Specifically, indispensable reserve ISCs marked by *Bmi1*- and *Hopx-CreERT2* alleles have been shown to give rise to dispensable *Lgr5-EGFP*<sup>+</sup> CBCs (Sangiorgi and Capecchi, 2008; Tian et al., 2011), indicating that two functionally distinct ISC populations exist. The broad acceptance of these findings has, however, been precluded by observations that endogenous *Bmi1* and *Hopx* transcripts are readily detectable in *Lgr5*<sup>+</sup> cells, a finding that has led to speculation that these ISC populations may mark cells along a continuum rather than two distinct populations. Our findings clearly demonstrate that the *Bmi1-CreER* and *Hopx-CreER*-marked populations contain primarily reserve ISCs that are molecularly distinct from the *Lgr5-EGFP*<sup>+</sup> CBCs, providing molecular support for the cell ablation studies demonstrating their functional dissimilarity.

The interpretation of ISC data is further confounded by the use of EGFP proxy reporters inserted into the reserve ISC loci. Whereas the *Hopx-EGFP* allele marks some cells with active CBC stem cell identity, as well as some reserve ISCs based on expression profiles and  $\gamma$ -IR studies, we conclude that this reporter acts as a nonspecific marker of intestinal crypt cells. This includes the presence of secretory precursor cells within the *Hopx-EGFP*<sup>+</sup> population

### Figure 5. Molecular Characterization of Reserve ISC versus Active CBC Stem Cell Progeny

(A–D) Heatmaps of gene expression of 48 transcripts across populations of single *Hopx-CreERT2* cells in the reference population (18 hr after Tomato activation; A), in the *Lgr5-EGFP* reference population (B), in the progeny of *Hopx-CreERT2* cells after 7 days of lineage tracing (C; n = 188), and in the progeny of *Lgr5-EGFP-IRES-CreERT2* cells after 7 days of lineage tracing (D; n = 95).

(E) Distribution of cellular identity defined by the algorithm in the four populations pictured in (A)–(D).

(F) Frequency of clonal-tracing events initiated by a single dose of Tam in *Lgr5-CreERT2::LSL-LacZ* or *Hopx-CreERT2::LSL-LacZ* mice (n = 15 independent experiments;  $\pm$ SD); \*\*\*p < 1  $\times$  10<sup>-4</sup>.

See also Figure S6.

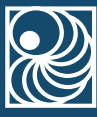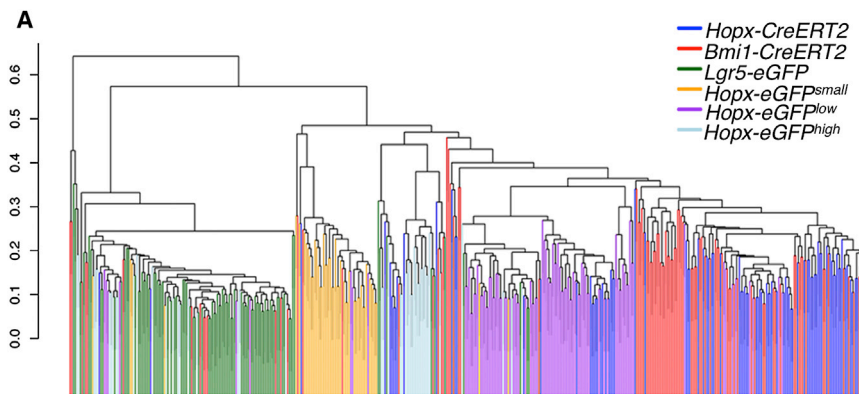

**Figure 6. Hierarchical Model of Cellular Identity**

(A) Unsupervised hierarchical clustering of single cells from proxy reporter allele-marked groups.

(B) Working model of intestinal stem cell hierarchy.

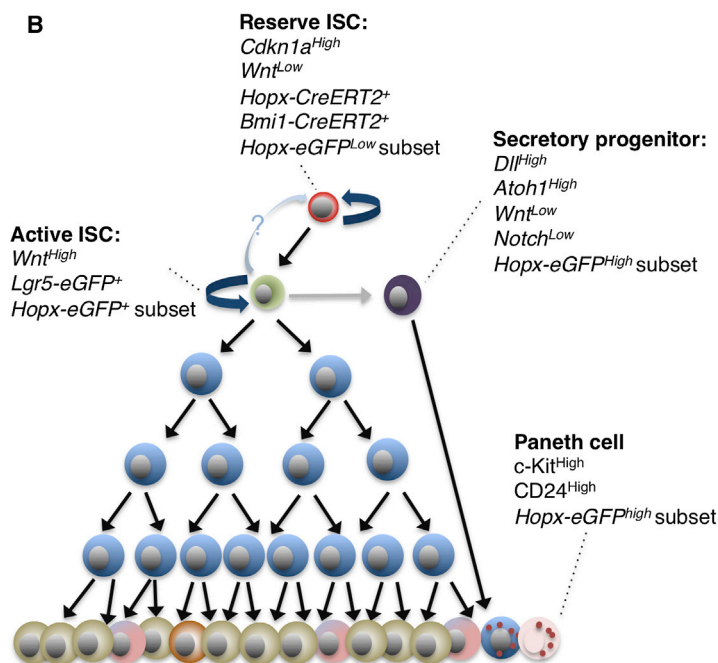

based on their gene-expression signature characterized by high *Atoh1* to *Wnt/Notch* pathway expression ratio (van Es et al., 2012).

Conversely, we also provide evidence that the *Bmi1-EGFP* allele does not recapitulate the expression pattern of its CreERT2 counterpart, and in fact, we are unable to reliably detect any *Bmi1-EGFP+* cells despite procuring these mice directly from Jackson Laboratories stocks. Thus, our data provide evidence that their use as proxies for reserve ISC activity is unreliable, at best, and can be misleading if presented as evidence for stem cell identity (as only the CreER reporters in the *Bmi1* and *Hopx* loci have been functionally demonstrated to mark reserve stem cells).

In contrast, the *Lgr5-EGFP-CreER* allele exhibits good correlation between the EGFP and CreER reporters. The *Lgr5* re-

porter is bicistronic, with EGFP and CreER emanating from a single transcript, whereas the *Bmi1* and *Hopx* reporters are derived from distinct targeting events with differing sites of integration. It is tempting to speculate that the alternative usage of untranslated regions governing mRNA stability accounts for the observed discrepancies, although no direct evidence for this hypothesis exists.

We also resolve the controversy surrounding the identity of reserve versus active ISCs resulting from the observation that endogenous *Bmi1* and *Hopx* transcripts are readily detectable in *Lgr5+* cells. Whereas we observe endogenous *Bmi1* and *Hopx* transcripts in *Bmi1-CreER* and *Hopx-CreER*-marked ISCs, the highest levels of these endogenous transcripts are actually present in *Lgr5-EGFP+* cells. This demonstrates a clear disjunction between the activity of



the reporter cassettes and the endogenous transcripts, which could be a result of message stability, CreER activity, or other unknown causes. Regardless of the underlying cause, our findings indicate that, in the case of reserve ISCs, the only alleles that reliably mark these cells are *Bmi1*- and *Hopx*-CreER and that the presence of the *Bmi1* and *Hopx* transcripts cannot act as proxies for reserve ISC activity.

Finally, we provide functional evidence supporting the previously proposed two-intestinal-stem-cell system (Li and Clevers, 2010). Through lineage tracing and single-cell profiling of daughter cells derived from either active (*Lgr5*-CreER<sup>+</sup>) or reserve (*Hopx*-CreER<sup>+</sup>) ISCs over time, we observe striking differences in the proliferative output of these two cell types. In their initial divisions, reserve ISCs self-renew and generate active *Lgr5*<sup>+</sup>-CBCs. In contrast, active *Lgr5*<sup>+</sup>-CBCs self-renew and generate differentiated progeny (Figure 6B).

These findings predict that *Lgr5*<sup>+</sup>-CBCs must have a significantly shorter lifespan than the reserve ISCs; otherwise, an age-related accumulation of *Lgr5*<sup>+</sup>-CBCs would result from the constant generation of CBCs from the reserve ISCs. Indeed, this finite lifespan of *Lgr5*<sup>+</sup>-CBCs can be observed in prior studies where the random activation of any one of four fluorophores in the *Lgr5*-CreER::R26R-Confetti mouse model results in multiple unique labeling events in any given crypt, and over time, clonal extinction is observed as a drift to monoclonality (Snippert et al., 2010).

In the current study, we directly compare the extinction of *Lgr5*-CreER- and *Hopx*-CreER-marked clones and demonstrate that, whereas approximately two thirds of *Lgr5* clones are lost over a 6-month period, there is no loss of *Hopx*-CreER-derived clones. This result provides additional evidence that the reserve ISC is capable of longer proliferative output than the *Lgr5*<sup>+</sup> CBC. Because CBCs have a shorter lifespan than the reserve *Hopx*-CreER ISCs, it is tempting to speculate that lost CBCs are replaced by new CBCs generated de novo from reserve ISCs. Although there is clear evidence that *Lgr5* cells compete with one another for crypt dominance through neutral drift (existing *Lgr5* cells replacing lost *Lgr5* cells through symmetric division), there is also clear evidence that reserve ISCs generate *Lgr5* cells, and thus, further studies are necessary to determine which mechanism of *Lgr5* cell replacement occurs during homeostasis and with what frequency.

Taken together, our findings provide support for the hierarchical two-stem-cell hypothesis previously proposed, where active and reserve stem cells exist in functionally and molecularly distinct states and argue against the notion that these two stem cell populations simply represent different stages of a single stem cell continuum.

## EXPERIMENTAL PROCEDURES

### Mouse Strains

*Lgr5*-EGFP-IRES-CreERT2 (JAX mice strain 008875), *Bmi1*-CreERT2 (JAX strain 010531), and *Bmi1*-EGFP (JAX strain 017351) mice were obtained from the Jackson Laboratory. *Hopx*-CreERT2 (JAX strain 017606) and *Hopx*-EGFP mice were generated at the University of Pennsylvania. Mice were maintained on a C57/BL6N background (or C57BL/Ka for *Bmi1*-EGFP). *TRE-H2BGFP* mice were obtained from Jackson Laboratory (Jax strain 016836). For all Cre induction experiments, mice received a single intraperitoneal injection of 100  $\mu$ l Tam (10 mg/ml in corn oil; Sigma; T5648). All mouse protocols were approved by the Institutional Animal Care and Use Committee at the University of Pennsylvania under protocol 803415 to Dr. Lengner.

### H2B-GFP Labeling

*TRE-H2BGFP::Hopx-CreERT2::lox-stop-lox-tdTomato* mice were maintained on dox for 6 weeks starting at postnatal day 14 in order to fully label all nuclei with GFP. Dox was withdrawn when mice reached 8 weeks of age and tdTomato lineage tracing was simultaneously initiated one dose of Tam. Mice were sacrificed 4–7 days after dox withdrawal and initiation of tracing.

### Two-Step Single-Cell Gene Expression

The two-step single-cell gene-expression protocol (advanced development protocol 33) from Fluidigm was adopted for this study. Briefly, 5  $\mu$ l of RT Mix Solution which includes 1.2  $\mu$ l 5 $\times$  VILO Reaction Mix (Life Technologies; 11754-250), 0.3  $\mu$ l SUPERase-In (Life Technologies; AM2696), and 0.25  $\mu$ l 10% NP40 (Thermo Scientific; 28324) was dispensed into each well of 96-well plate. Single cells were sorted into the well directly. The plate was vortexed and immediately frozen on dry ice. For room temperature cycling, the plate was thawed on ice and RNA denatured by incubating at 65°C for 90 s and then chilled on ice for 5 min. Each well was supplemented with 1  $\mu$ l mixture of 10 $\times$  SuperScript Enzyme Mix (Life Technologies; 11754-250) and T4 Gene 32 Protein (New England BioLabs; PN M03005). mRNA was reverse transcribed into cDNA following the thermal cycling conditions below: 25°C, 5 min/50°C, 30 min/55°C, 25 min/60°C, 5 min/70°C, and 10 min. Resulting cDNA was preamplified with 50 nM primer mix for 23 PCR cycles (96°C for 5 s and 60°C for 4 min) and then treated with ExoI for 30 min to remove unincorporated primers. The final product was diluted 1:3 with Tris-EDTA (TE) buffer. For each chip sample inlet, 2.25  $\mu$ l diluted cDNA, 2.5  $\mu$ l 2 $\times$  Sso Fast EvaGreen supermix with low ROX, and 0.25  $\mu$ l of Fluidigm sample loading agent were added. Individual gene-specific DELTAgene assays were diluted at 1:10 ratios with TE buffer. Two and a half microliters of each primer was then mixed with 2.5  $\mu$ l assay loading agent inserted into chip “assay” inlets. Chip loading and PCR was performed according to the manufacturer’s protocol. The data were analyzed by Fluidigm Gene Expression Analysis Package.

Genes analyzed include: *Areg*, *Ascl2*, *Atoh1*, *Axin2*, *Bmi1*, *Bmpr1a*, *Ccnd1*, *Cdkn1a*, *Cdx1*, *Chga*, *Cubn*, *Dll4*, *Dvl2*, *Efnb1*, *Epas1*, *Ephb2*, *Ereg*, *Fut2*, *Gapdh*, *Gsk3b*, *Gusb*, *H6pd*, *Hes1*, *Hes5*, *Hif1a*, *Hopx*, *Jag1*, *Lgr5*, *Lrig1*, *Lyz2*, *Msi1*, *Msi2*, *Myb*, *Myc*, *Notch1*, *Numb*, *Olfm4*, *Pcna*, *Ppargc1b*, *Rhoa*, *Saa2*, *Sirt3*,



Sox9, Tat, Tcf4, Tert, Wnt3, and Wnt6. Details regarding the generation and training of the ISC identity-calling algorithm can be found in the [Supplemental Information](#).

### Histological Scoring of Hopx-CreER and Lgr5-CreER-Derived R26R-LacZ Clones

Archived tissue from *Hopx-CreER::R26-LSL-LacZ* and *Lgr5-EGFP-IRES-CreER::R26-LSL-LacZ* small intestines were provided by and described in [Takeda et al. \(2011\)](#). The frequency of clonal tracing events in crypts (LacZ+ clones) from 5-day and 6-month lineage traces was scored in freshly cut paraffin sections. For *Hopx-CreER*, a total of 641 crypts were scored at day 5 and 739 at 6 months. For *Lgr5-CreER*, a total of 809 crypts were scored at day 5 and 1,048 at 6 months.

### SUPPLEMENTAL INFORMATION

Supplemental Information includes Supplemental Experimental Procedures, six figures, and four tables and can be found with this article online at <http://dx.doi.org/10.1016/j.stemcr.2014.09.011>.

### ACKNOWLEDGMENTS

We thank Drs. Anil Rustgi and John Lynch in the Division of Gastroenterology, Department of Medicine, University of Pennsylvania for reagents and fruitful discussions. C.J.L. is funded by R01 CA168654 from the National Cancer Institute. This work was supported in part by a pilot award from the University of Pennsylvania Institute for Regenerative Medicine and the NIH/NIDDK Center for Molecular Studies in Digestive and Liver Diseases (P30DK050306) and its core facilities (molecular pathology and imaging, molecular biology/gene expression, cell culture, and mouse), and C.J.L. was supported by the center's pilot and feasibility grant program.

Received: July 8, 2014

Revised: September 10, 2014

Accepted: September 11, 2014

Published: October 23, 2014

### REFERENCES

Barker, N., van Es, J.H., Kuipers, J., Kujala, P., van den Born, M., Cozijnsen, M., Haegbarth, A., Korving, J., Begthel, H., Peters, P.J., and Clevers, H. (2007). Identification of stem cells in small intestine and colon by marker gene *Lgr5*. *Nature* **449**, 1003–1007.

Buczacki, S.J., Zecchini, H.I., Nicholson, A.M., Russell, R., Vermeulen, L., Kemp, R., and Winton, D.J. (2013). Intestinal label-retaining cells are secretory precursors expressing *Lgr5*. *Nature* **495**, 65–69.

Chen, F., Kook, H., Milewski, R., Gitler, A.D., Lu, M.M., Li, J., Nazarian, R., Schnepf, R., Jen, K., Biben, C., et al. (2002). *Hop* is an unusual homeobox gene that modulates cardiac development. *Cell* **110**, 713–723.

de Lau, W., Barker, N., Low, T.Y., Koo, B.K., Li, V.S., Teunissen, H., Kujala, P., Haegbarth, A., Peters, P.J., van de Wetering, M., et al.

(2011). *Lgr5* homologues associate with Wnt receptors and mediate R-spondin signalling. *Nature* **476**, 293–297.

Izkovitz, S., Lyubimova, A., Blat, I.C., Maynard, M., van Es, J., Lees, J., Jacks, T., Clevers, H., and van Oudenaarden, A. (2012). Single-molecule transcript counting of stem-cell markers in the mouse intestine. *Nat. Cell Biol.* **14**, 106–114.

Li, L., and Clevers, H. (2010). Coexistence of quiescent and active adult stem cells in mammals. *Science* **327**, 542–545.

Merlos-Suárez, A., Barriga, F.M., Jung, P., Iglesias, M., Céspedes, M.V., Rossell, D., Sevillano, M., Hernando-Momblona, X., da Silva-Diz, V., Muñoz, P., et al. (2011). The intestinal stem cell signature identifies colorectal cancer stem cells and predicts disease relapse. *Cell Stem Cell* **8**, 511–524.

Metcalfe, C., Kljavin, N.M., Ybarra, R., and de Sauvage, F.J. (2014). *Lgr5+* stem cells are indispensable for radiation-induced intestinal regeneration. *Cell Stem Cell* **14**, 149–159.

Molofsky, A.V., Pardoll, R., Iwashita, T., Park, I.K., Clarke, M.F., and Morrison, S.J. (2003). *Bmi-1* dependence distinguishes neural stem cell self-renewal from progenitor proliferation. *Nature* **425**, 962–967.

Muñoz, J., Stange, D.E., Schepers, A.G., van de Wetering, M., Koo, B.K., Izkovitz, S., Volckmann, R., Kung, K.S., Koster, J., Radulescu, S., et al. (2012). The *Lgr5* intestinal stem cell signature: robust expression of proposed quiescent ‘+4’ cell markers. *EMBO J.* **31**, 3079–3091.

Park, I.K., Qian, D., Kiel, M., Becker, M.W., Pihalja, M., Weissman, I.L., Morrison, S.J., and Clarke, M.F. (2003). *Bmi-1* is required for maintenance of adult self-renewing haematopoietic stem cells. *Nature* **423**, 302–305.

Potten, C.S., Owen, G., and Booth, D. (2002). Intestinal stem cells protect their genome by selective segregation of template DNA strands. *J. Cell Sci.* **115**, 2381–2388.

Sangiorgi, E., and Capecchi, M.R. (2008). *Bmi1* is expressed in vivo in intestinal stem cells. *Nat. Genet.* **40**, 915–920.

Sato, T., Vries, R.G., Snippert, H.J., van de Wetering, M., Barker, N., Stange, D.E., van Es, J.H., Abo, A., Kujala, P., Peters, P.J., and Clevers, H. (2009). Single *Lgr5* stem cells build crypt-villus structures in vitro without a mesenchymal niche. *Nature* **459**, 262–265.

Snippert, H.J., van der Flier, L.G., Sato, T., van Es, J.H., van den Born, M., Kroon-Veenboer, C., Barker, N., Klein, A.M., van Rheenen, J., Simons, B.D., and Clevers, H. (2010). Intestinal crypt homeostasis results from neutral competition between symmetrically dividing *Lgr5* stem cells. *Cell* **143**, 134–144.

Steinhauser, M.L., Bailey, A.P., Senyo, S.E., Guillemier, C., Perlstein, T.S., Gould, A.P., Lee, R.T., and Lechene, C.P. (2012). Multi-isotope imaging mass spectrometry quantifies stem cell division and metabolism. *Nature* **481**, 516–519.

Takeda, N., Jain, R., LeBoeuf, M.R., Wang, Q., Lu, M.M., and Epstein, J.A. (2011). Interconversion between intestinal stem cell populations in distinct niches. *Science* **334**, 1420–1424.

Takeda, N., Jain, R., Leboeuf, M.R., Padmanabhan, A., Wang, Q., Li, L., Lu, M.M., Millar, S.E., and Epstein, J.A. (2013). *Hopx* expression defines a subset of multipotent hair follicle stem cells and a progenitor population primed to give rise to *K6+* niche cells. *Development* **140**, 1655–1664.

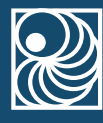

Tian, H., Biehs, B., Warming, S., Leong, K.G., Rangell, L., Klein, O.D., and de Sauvage, F.J. (2011). A reserve stem cell population in small intestine renders Lgr5-positive cells dispensable. *Nature* *478*, 255–259.

van Es, J.H., Sato, T., van de Wetering, M., Lyubimova, A., Nee, A.N., Gregorieff, A., Sasaki, N., Zeinstra, L., van den Born, M., Korving, J., et al. (2012). Dll1+ secretory progenitor cells revert to stem cells upon crypt damage. *Nat. Cell Biol.* *14*, 1099–1104.

Wang, F., Wang, J., Liu, D., and Su, Y. (2010). Normalizing genes for real-time polymerase chain reaction in epithelial and none-

pithelial cells of mouse small intestine. *Anal. Biochem.* *399*, 211–217.

Yan, K.S., Chia, L.A., Li, X., Ootani, A., Su, J., Lee, J.Y., Su, N., Luo, Y., Heilshorn, S.C., Amieva, M.R., et al. (2012). The intestinal stem cell markers Bmi1 and Lgr5 identify two functionally distinct populations. *Proc. Natl. Acad. Sci. USA* *109*, 466–471.

Yui, S., Nakamura, T., Sato, T., Nemoto, Y., Mizutani, T., Zheng, X., Ichinose, S., Nagaishi, T., Okamoto, R., Tsuchiya, K., et al. (2012). Functional engraftment of colon epithelium expanded in vitro from a single adult Lgr5<sup>+</sup> stem cell. *Nat. Med.* *18*, 618–623.



**Stem Cell Reports, Volume 3**

**Supplemental Information**

**Single-Cell Analysis of Proxy Reporter Allele-Marked  
Epithelial Cells Establishes Intestinal Stem Cell Hierarchy**

**Ning Li, Maryam Yousefi, Angela Nakauka-Ddamba, Rajan Jain, John Tobias, Jonathan  
A. Epstein, Shane T. Jensen, and Christopher J. Lengner**

Supplemental Figure 1 *Li et al*

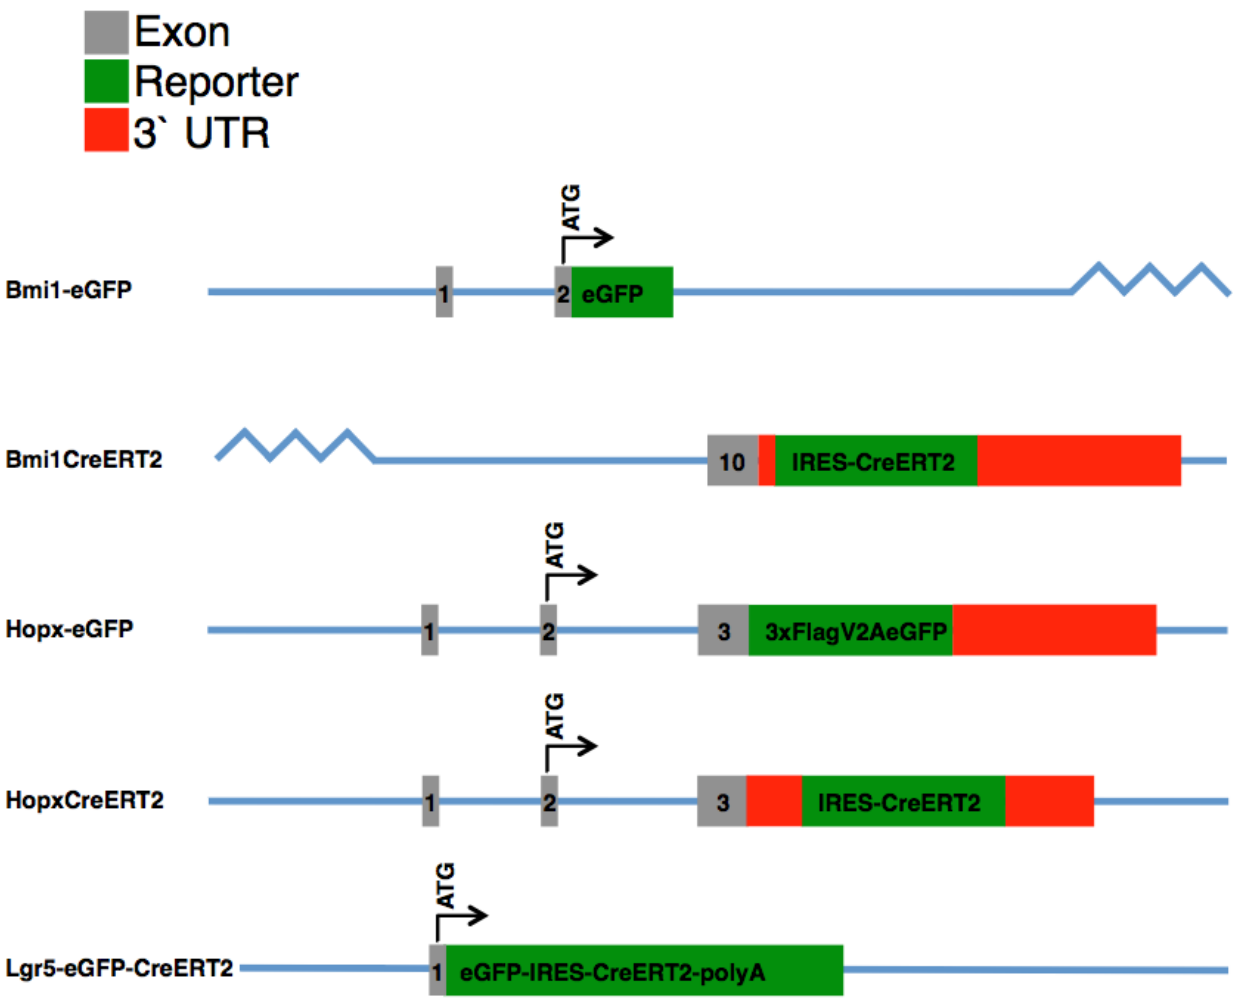

# Supplemental Figure 2

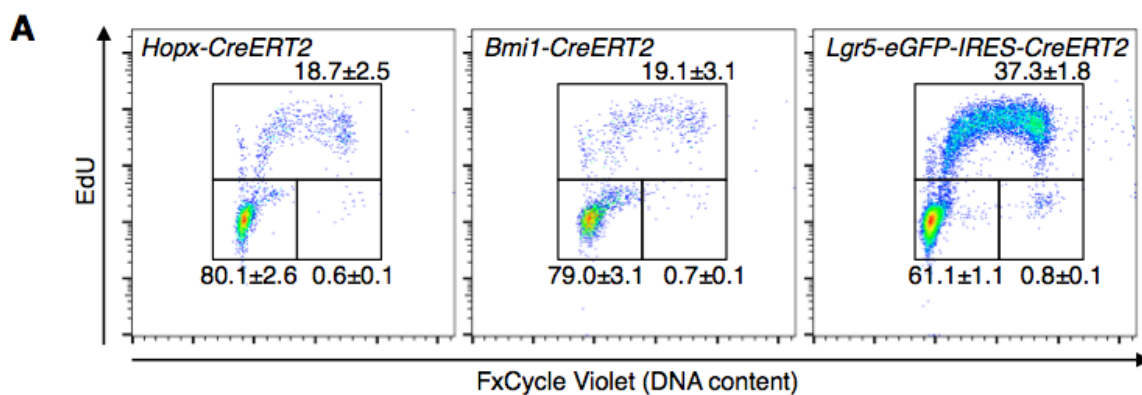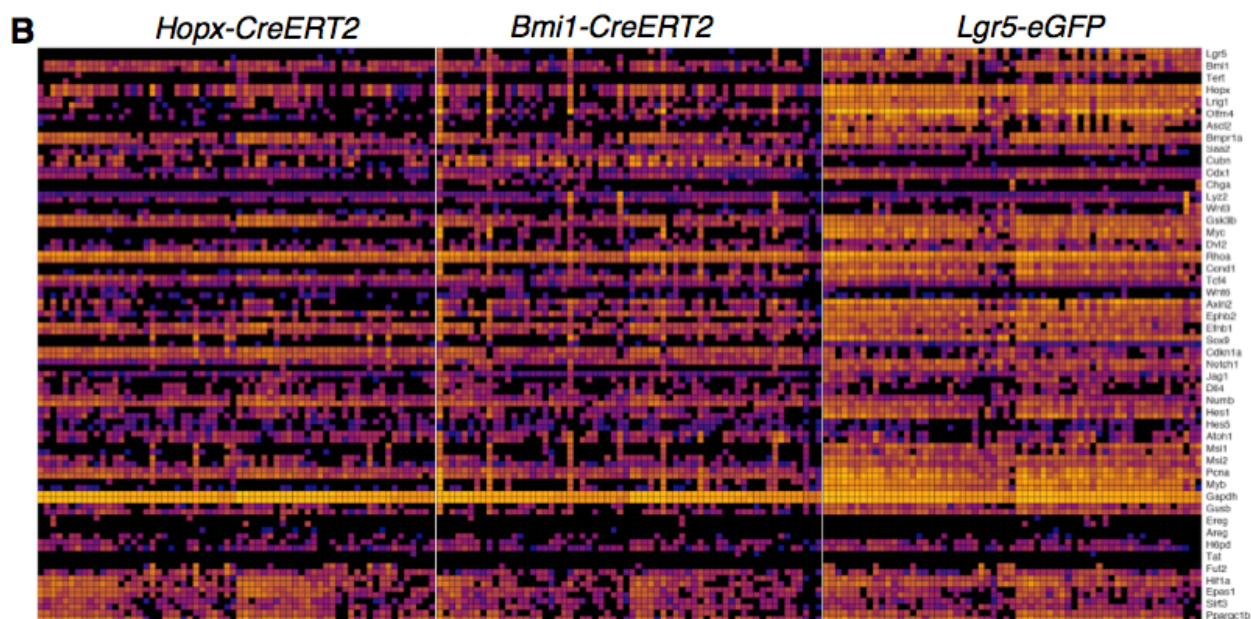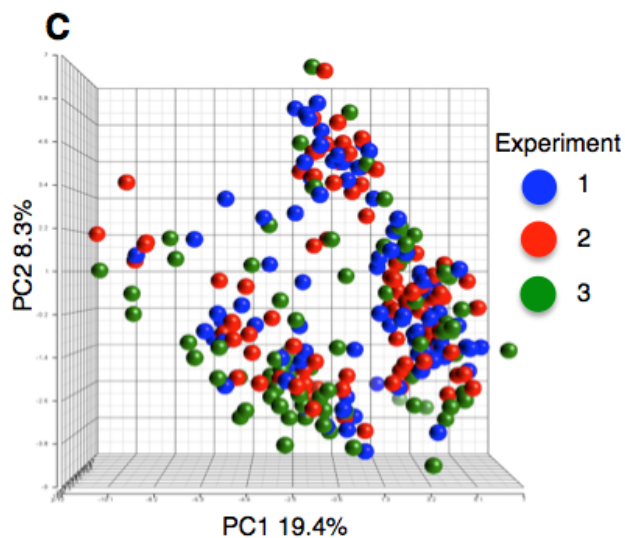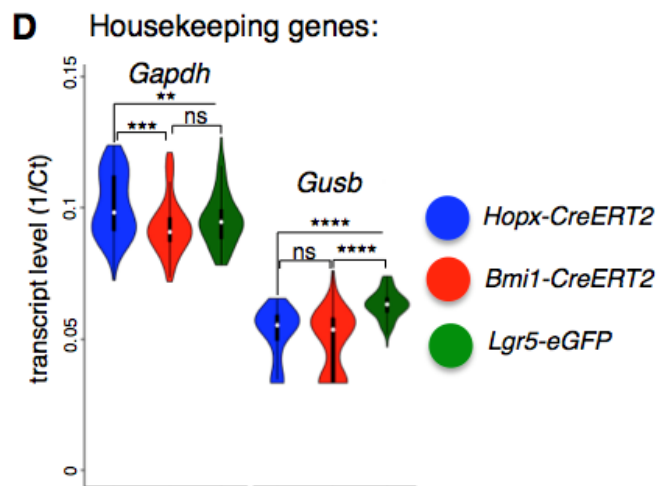

# Supplemental Figure 3

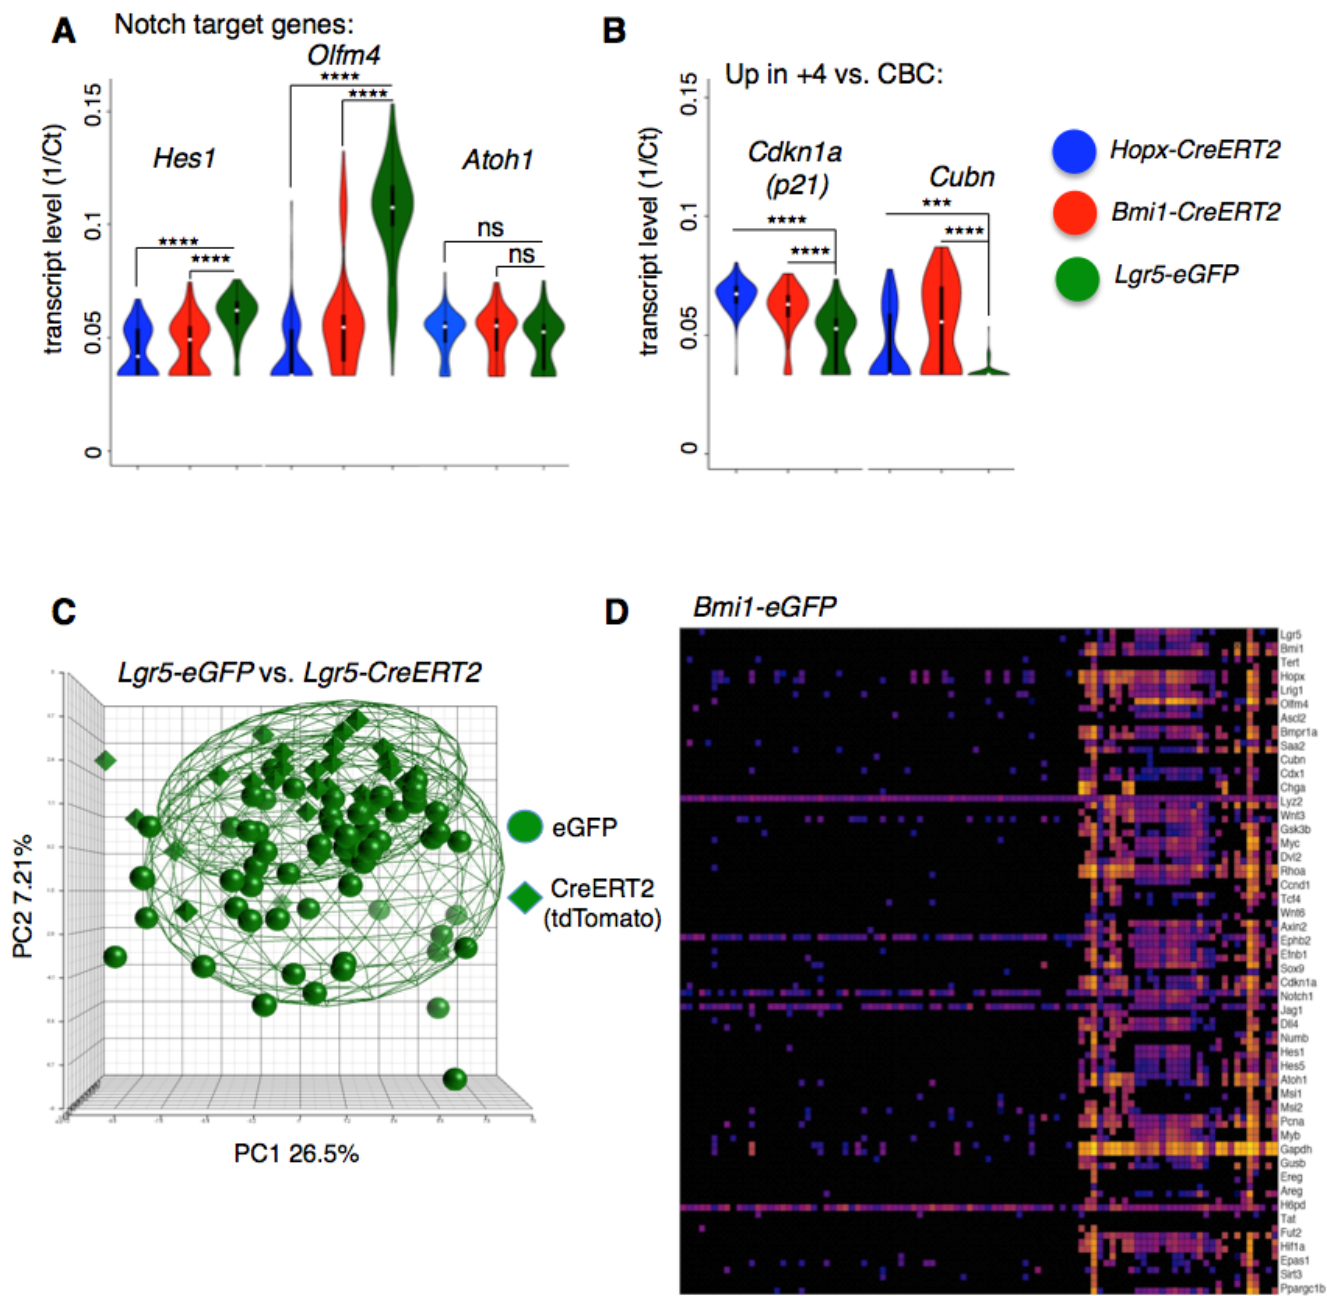

# Supplemental Figure 4 *Li et al*

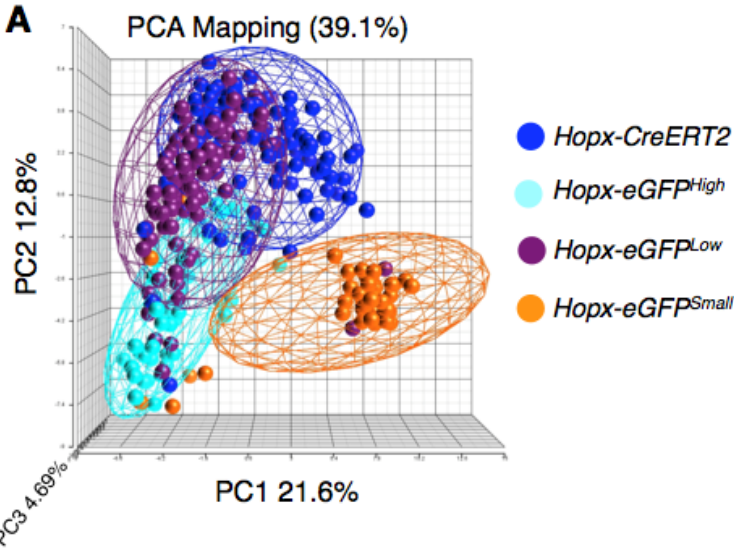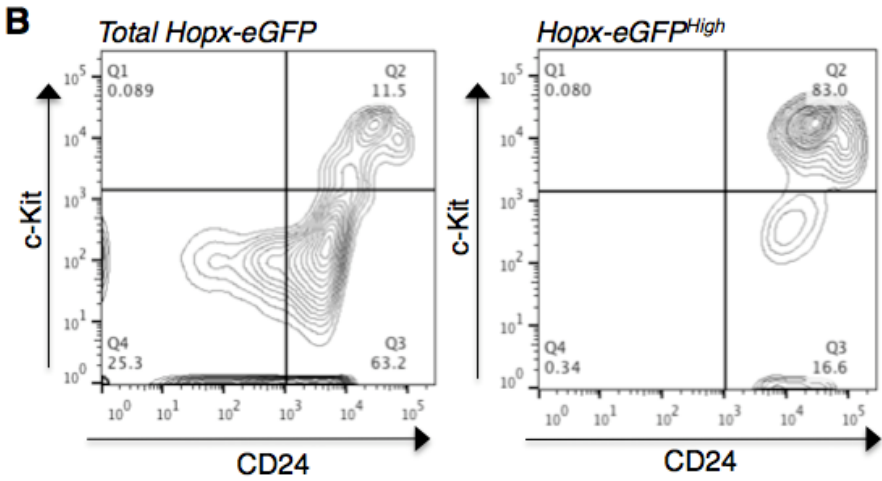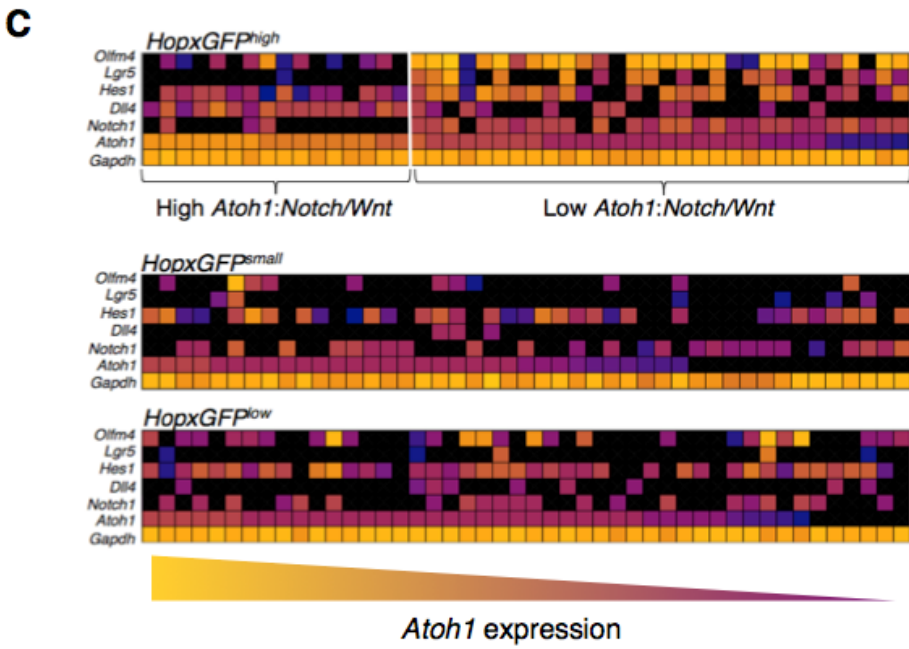

# Supplemental Figure 5 *Li et al*

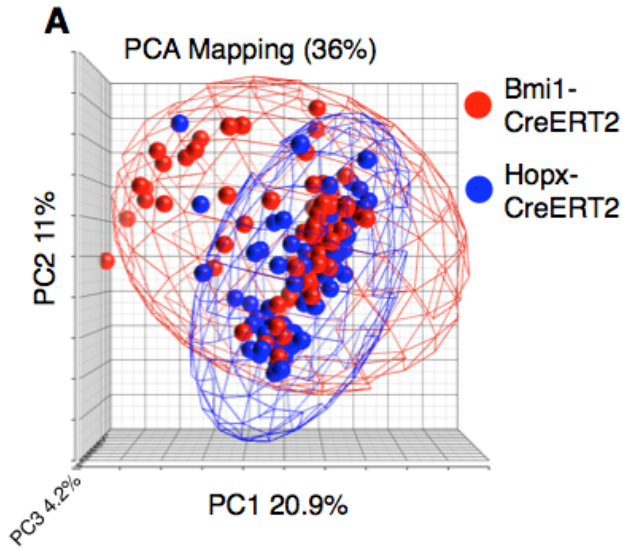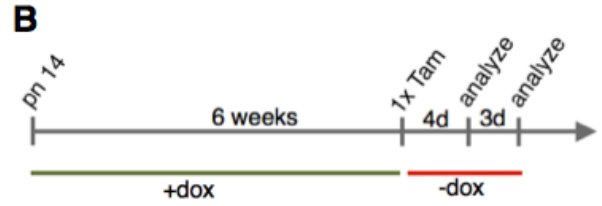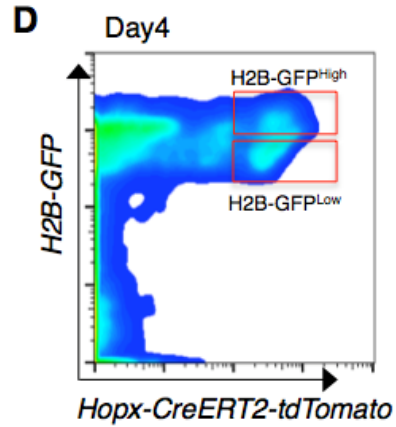

**C** Hopx-CreERT2-tdTomato tracing

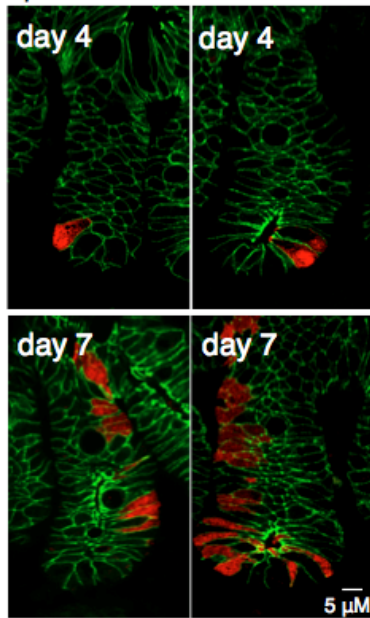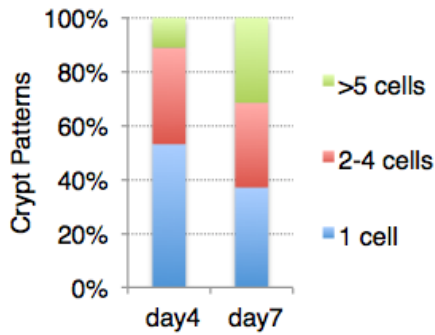

**E** Hopx-CreERT2-tdTomato: 4 day trace

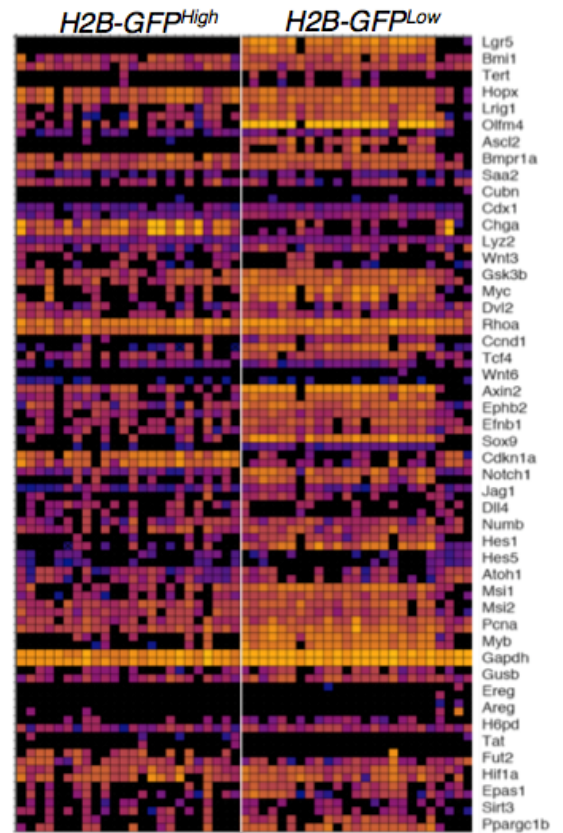

# Supplemental Figure 6 *Li et al*

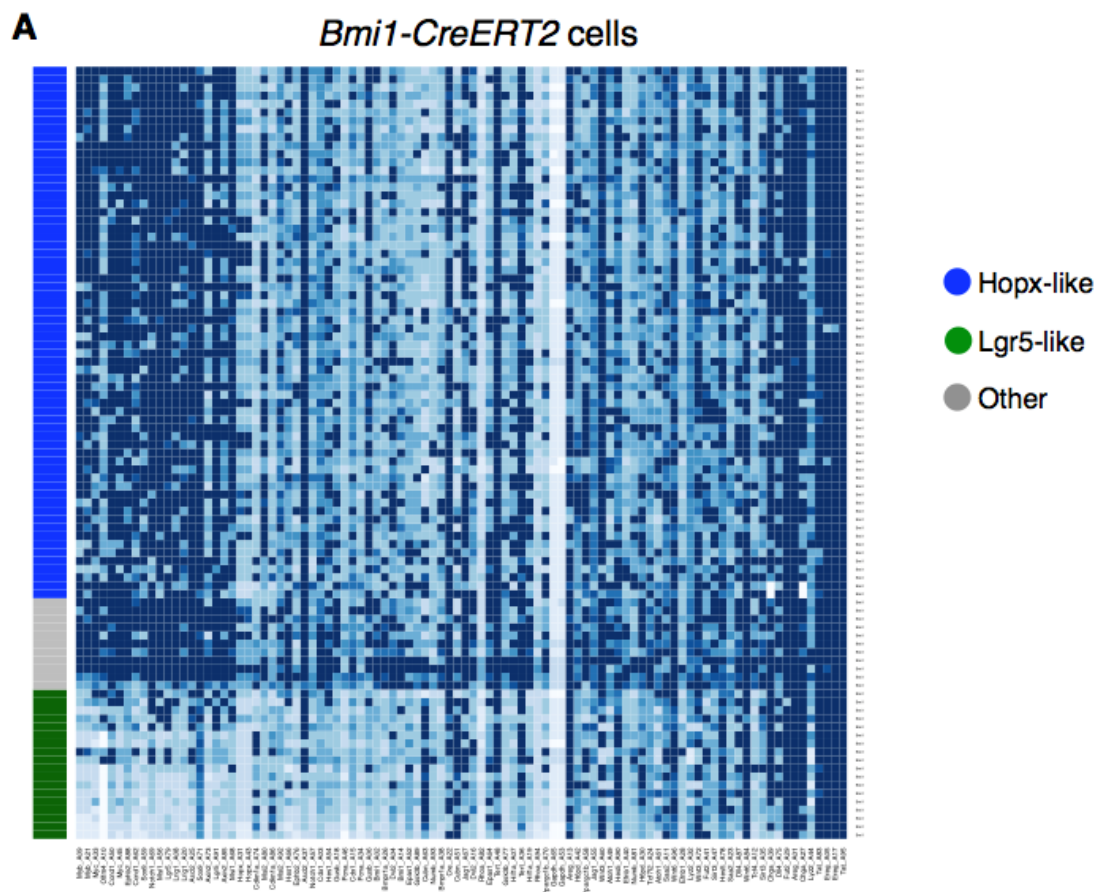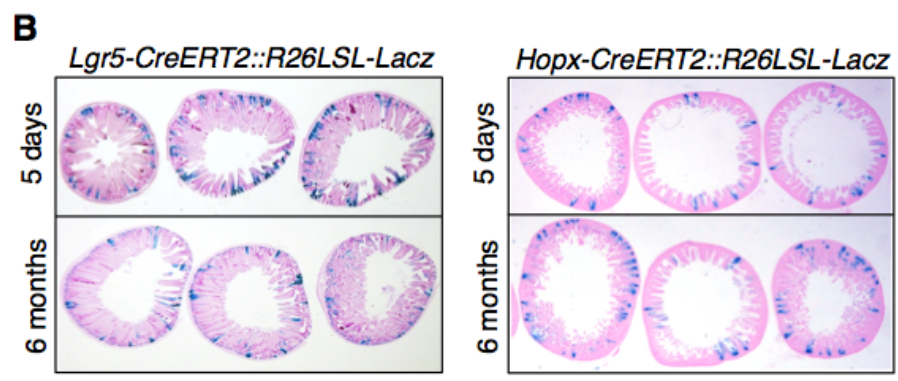

## Supplemental Figure Legends

**Supplemental Figure 1. Marker alleles analyzed.** Site of insertion of *CreERT2* and *eGFP* proxy reporter alleles into endogenous *Bmi1*, *Hopx*, and *Lgr5* loci, relative to endogenous coding regions and untranslated regions (UTR). Refers to main Figure 1.

**Supplemental Figure 2. Single cell analysis of bona fide ISC populations marked by *Bmi1-CreERT2*, *Hopx-CreERT2*, and *Lgr5-eGFP-IRES-CreERT2*.** **A.** Flow cytometric analysis of cell cycle in the designated reporter-marked cell populations after a two-hour *in vivo* pulse labeling with EdU. **B.** Heatmap of gene expression across the three reporter-marked cell populations with a single cell in each column interrogated by 96 pairs of primers targeting 48 genes in duplicate. **C.** Principal component plot as in **Figure 2C**, color-coded by experiment number rather than reporter allele identity. **D.** Violin plots of the transcript levels of frequently used intestinal housekeeping genes *Gapdh* and *Gusb* in the designated reporter-marked cell populations. Asterisks indicate significance of differences in mean expression between indicated populations. \*\*\*\*:  $p < 1 \times 10^{-10}$ , \*\*\*:  $p < 1 \times 10^{-5}$ , \*\*:  $p < 0.005$ . Refers to main Figure 2.

**Supplemental Figure 3. Single cell analysis of ISC populations.** **A.** Violin plots of the transcript levels Notch target genes in the designated populations. **B.** Violin plots transcript levels of the genes that best define reserve ISC identity versus active ISC identity, *Cdkn1a* and *Cubn* in the designated populations. Asterisks indicate significance of differences in mean expression between indicated populations. \*\*\*\*:  $p < 1 \times 10^{-10}$ , \*\*\*:  $p < 1 \times 10^{-5}$ . **C.** Principal component analysis of single *Lgr5-eGFP<sup>+</sup>* cells and tdTomato<sup>+</sup> cells 18 hours after activation of the tdTomato reporter in *Lgr5-eGFP-IRES-CreERT2* mice with a single Tam dose. **D.** Heatmap of gene expression single FACS-purified *Bmi1-eGFP<sup>+</sup>* cells with a single cell in each column interrogated by 96 pairs of primers targeting 48 genes in duplicate (n=96). Refers to main Figure 2.

**Supplemental Figure 4. Analysis of *Hopx-eGFP*-marked intestinal epithelial cells.** **A.** Principal component analysis of the three *Hopx-eGFP<sup>+</sup>* populations versus *Hopx-CreERT2<sup>+</sup>* cells. **B.** Flow cytometric analysis of Paneth cells c-Kit<sup>High</sup>, CD24<sup>High</sup> in the total *Hopx-eGFP<sup>+</sup>* population (Top) and in the *Hopx-eGFP<sup>High</sup>* population (Bottom). **C.** Heatmaps showing *Atoh1* expression relative to the designated Notch and Wnt-related genes in single cells isolated from the three *Hopx-eGFP<sup>+</sup>* populations, ranked by *Atoh1* transcript level. Refers to main Figure 3.

**Supplemental Figure 5. Analysis of reserve ISCs and their progeny.** **A.** Principal component analysis comparing *Hopx-CreERT2<sup>+</sup>* and *Bmi1-CreERT2<sup>+</sup>* cells. **B.** Strategy for pulse-chase labeling intestinal epithelial cells with doxycycline-inducible H2B-eGFP followed by chase and initiation of lineage tracing with a single Tam dose. **C.** Representative images of lineage tracing patterns in *Hopx-CreERT2-tdTomato* intestinal epithelium 4 or 7 days after a single Tam dose, with frequency of different observed patterns quantified below. Tomato is labeled in red, E-cadherin in green. **D.** FACS gating strategy for profiling H2B-eGFP<sup>High</sup> versus H2B-eGFP<sup>Low</sup> progeny of *Hopx-CreERT2<sup>+</sup>* cells. **E.** Heatmap of gene expression in single H2B-eGFP<sup>High</sup> versus H2B-eGFP<sup>Low</sup> progeny of *Hopx-CreERT2<sup>+</sup>* cells. Refers to main Figure 4.

**Supplemental Figure 6. Cell-identity classification of *Bmi1-CreER*-marked cells.** **A.** Single cells isolated from *Bmi1-CreERT2<sup>+</sup>::LSL-Tomato* mice 18 hours after a single Tam injection were assigned identities with the algorithm trained on *Hopx-CreERT2<sup>+</sup>* and *Lgr5-eGFP<sup>+</sup>* cells. **B.** Representative micrographs of Lacz<sup>+</sup> clones derived from *Lgr5-CreERT2::R26-LSL-Lacz* and *Hopx-CreERT2::R26-LSL-Lacz* mice 5 days and 6 months after initiation of lineage tracing with one dose of tamoxifen. Refers to main Figure 5.



## Supplemental Methods

### *Flow Cytometry and Single-Cell Sorting*

The intestine was cut open longitudinally and incubated with 5mM EDTA-HBSS solution at 4 °c for 30min to isolate epithelial cells. To generate a single cell suspension, cells were incubated with Accutase (BD Biosciences, San Jose, CA) at 37°C for 10min. Flow cytometry analysis was performed with BD LSRFortessa cell analyzer (BD Biosciences, San Jose, CA). DAPI negative cells were selected, then gated for single cell based on Forward-scatter height versus forward-scatter width (FSC-H vs FSC-W) and side-scatter height vs side-scatter width (SSC-H vs. SSC-W) profiles. Single-cell sorting experiments was performed with BD FACSArial cell sorter, each single cell was sorted into a different well of a 96-well PCR plate, using the FACSArial flow cytometer software package (FACSDiva) with single cell precision mode. Paneth cell isolation was done based on CD24 (eBioscience, 12-0242081)) and c-Kit (eBioscience, 25-1171-81) double staining. The size of the nozzle for all sorting is 100 µm (20 psi).

### *Intestinal Organoid Formation Assays.*

Crypt organoid culture was performed as described previously (Sato et al., 2009). After intestinal crypt isolation and single cell digestion, a total of 1000 cells were sorted into one well of 96-well-plate coated with 50 µl of Matrigel (BD Bioscience). 100 µl of crypt culture medium (Advanced DMEM/F12 containing growth factors (50 ng/ml EGF (Invitrogen), 1 •g/ml R-spondin 1 (Wistar Institute protein production facility), 100 ng/ml Noggin (Peprotech) and 3 •M GSK-3 inhibitor (CHIR99021, Stemgent) was added. Pictures were taken after 10 days culture. The error bars represent the standard deviation from three biological replicates.

### *EdU Labeling and Radiation Injury*

To assess the frequency and proliferation of *HopX-eGFP*<sup>+</sup> cells in response to injury, *HopX-eGFP* mice received 12 Gy whole body  $\gamma$ -irradiation. Irradiated mice and their littermate controls (non-irradiated *HopX-eGFP* mice) were injected with 0.3mg/kg body weight of 5-ethynyl-2'-deoxyuridine (EdU) (Life technologies) intraperitoneally 2 days after irradiation injury and 2 hours before euthanasia and isolation of the intestinal epithelium. After washing the longitudinally opened intestine in PBS, it was moved to 30 mM EDTA (EDTA, Sigma) and 1.5 mM DTT (Sigma) in HBSS at 4°C for 20 minutes. Then the intestine was incubated in 30 mM EDTA in HBSS at 37°C for 10 minutes. Vigorous pipetting was done to dissociate intestinal epithelium and single cell suspension was generated with 0.8 mg/ml Dispase (GIBCO). For

labeling proliferative cells Click-iT® Plus EdU Alexa Fluor® 647 Flow Cytometry Assay Kit (Life technologies) was used and proliferative cells were marked with Alexa fluor 647 azide dye according to the user manual. Analysis of frequency and proliferation of GFP<sup>+</sup> cells were done using flow cytometry on an LSR Fortessa and Flowjo software was used for data analysis. For histological analysis of EdU, intestinal tissues were formalin fixed and paraffin embedded, and EdU was labeled with the Click-iT®, using approximately 250  $\mu$ L of reaction cocktail per slide. The slides were then washed and treated with mounting media containing DAPI.

### *Immunofluorescence*

Intestines were fixed in 10% Formalin, paraffin-embedded and sectioned. Paraffin sections were pretreated in 0.01 M citrate buffer (pH 6) in a pressure cooker, incubated in primary antibodies, then incubated with Cy2- or Cy3- conjugated secondary antibodies (Jackson Laboratory) and counterstained with DAPI in mounting media (Vector labs). The following antibodies were used: DsRed (Clontech, 632496), GFP (Abcam, AB 6673). Images were acquired with a Zeiss Axioplan upright microscope and Leica TCS SP8 confocal microscope. Image processing was done using Fiji.

### *Reserve (Hopx-CreER<sup>+</sup>) vs. CBC (Lgr5<sup>+</sup>) Single Cell Classification*

We trained a classification procedure for classifying any cell as either: 1. a *Hopx-CreER<sup>+</sup>* cell, 2. a *Lgr5<sup>+</sup>* cell or 3. a negative reference (other) cell type. This classification procedure was trained on a population of pure *Hopx-CreER<sup>+</sup>* cells, a population of pure *Lgr5<sup>+</sup>* cells and a negative reference population (all epithelial cells excluding *Hopx-eGFP<sup>+</sup>* cells which contain cells with both reserve and CBC stem cell identity (as seen in Figure 3).

Based on these populations, we calculated for each primer pair  $g$  ( $g = 1, \dots, 96$ ):

1.  $H(g,c)$ , the proportion of pure *Hopx-CreER<sup>+</sup>* cells that had each possible cycle value  $c$ .
2.  $L(g,c)$ , the proportion of pure *Lgr5<sup>+</sup>* cells that had each possible cycle value  $c$ .
3.  $N(g,c)$ , the proportion of negative reference cells that had each possible cycle value  $c$ .

The possible cycle values were  $c = 0, 1, \dots, 30$ .

As a running example, consider a pure *Hopx-CreER<sup>+</sup>* population with only four cells that had measured cycle values of 28, 29, 30, and 30 for a particular primer pair  $g$ . In this case,  $H(g,30) = 0.50$  and  $H(g,28) = H(g,29) = 0.25$  and  $H(g,0) = H(g,1) = \dots = H(g,27) = 0.0$

These proportions  $H(g,c)$ ,  $L(g,c)$  and  $N(g,c)$  are used to compare the similarity of new cell to the *Hopx-CreER+*, *Lgr5* and the negative reference populations. Specifically, let  $X$  be the cycle value for gene  $g$  in this new cell. We calculate the *Hopx-CreER+* similarity for gene  $g$  in this new cell as:

$$\text{Hopx.Similarity}(g) = H(g,X) / [H(g,X) + L(g,X) + N(g,X)]$$

In other words, if this new cell has a cycle value of  $X$  for primer pair  $g$  and if the pure *Hopx-CreER+* population also has many cells with that same cycle value (large  $H(g,X)$ ), then we will give that new cell a high similarity to pure *Hopx-CreER+* for that primer pair  $g$ . We also calculate the similarity of the new cell to *Lgr5+* and the negative reference on primer pair  $g$ :

$$\text{Lgr5.Similarity}(g) = L(g,X) / [H(g,X) + L(g,X) + N(g,X)]$$

$$\text{NegRef.Similarity}(g) = N(g,X) / [H(g,X) + L(g,X) + N(g,X)]$$

Then, the total similarity of the new cell to *Hopx-CreER+* is the sum of the similarities for each primer pair  $g$  across all the primer pairs ( $g = 1, \dots, 96$ ):

$$\text{Hopx.Similarity.Total} = \text{Sum}_g \text{Hopx.Similarity}(g),$$

and the corresponding similarity of the new cell to *Lgr5+* or the negative reference is:

$$\text{Lgr5.Similarity.Total} = \text{Sum}_g \text{Lgr5.Similarity}(g)$$

$$\text{NegRef.Similarity.Total} = \text{Sum}_g \text{NegRef.Similarity}(g)$$

Finally, we classify the new cell as *Hopx-CreER+*, *Lgr5+* or Negative Reference based on the maximum of these similarity scores, i.e.

New cell = *Hopx-like* if  $\text{Hopx.Similarity.Total} > \text{Lgr5.Similarity.Total}$  and  $\text{Hopx.Similarity.Total} > \text{NegRef.Similarity.Total}$

or

New cell = *Lgr5-like* if  $\text{Lgr5.Similarity.Total} > \text{Hopx.Similarity.Total}$  and  $\text{Lgr5.Similarity.Total} > \text{NegRef.Similarity.Total}$

or

New cell = Negative Reference if  $\text{NegRef.Similarity.Total} > \text{Hopx.Similarity.Total}$  and  $\text{NegRef.Similarity.Total} > \text{Lgr5.Similarity.Total}$

*Correlation Matrices*

Within each population of cells (e.g. pure *Hopx-CreER<sup>+</sup>* cells, pure *Lgr5-eGFP<sup>+</sup>* cells, etc.), we calculated the Pearson correlation of the cycle values between each pair of genes. The Pearson correlation ranges between -1 and 1 and measures the degree of linear association in the cycle values between a pair of genes and is color coded, with the coding of color to numerical value presented in supplemental table 2. The R package ‘corrplot’ was used to calculate and visualize the correlations between each pair of genes.

### *Violin Plots*

Violin plots were generated as follows. For each cell, we have a measure of the cycle time for 96 primer sets (48 genes with duplicate primer sets). A cycle value of 30 was imputed for any cycle values that did not amplify by 30 cycles (i.e., no signal). For each gene, violin plots were constructed using the statistical software R to compare the distribution of cycle times for that gene between the conditions. For PCA analysis, Fluidigm Ct values were averaged for each gene (across the two primer sets per gene) in each sample. Principal Components Analysis (PCA, using Partek Genomics Suite v6.6, Partek, Inc. St. Louis, MO) was used to visualize the global variation across the samples. Samples were colored to represent their condition. Statistical significance of differences between the mean expression values between populations was calculated using an independent sample t-test. Asterisks in figures denotes p-value for significance of differences in the mean expression value of the indicated gene across the indicated single cell populations.

### *Hierarchical Clustering*

We calculated the Pearson correlation of the cycle values (across all 96 primer sets) between each pair of cells in all cell populations. These correlations were inputted into an agglomerative clustering algorithm to create a hierarchical clustering of all cells, with each population labeled with a different color. The R package ‘hclust’ was used (with the average linkage setting) to create the hierarchical clustering.

## Supplemental References

- Sangiorgi, E., and Capecchi, M.R. (2008). *Bmi1* is expressed in vivo in intestinal stem cells. *Nature genetics* *40*, 915-920.
- Sato, T., Vries, R.G., Snippert, H.J., van de Wetering, M., Barker, N., Stange, D.E., van Es, J.H., Abo, A., Kujala, P., Peters, P.J., *et al.* (2009). Single *Lgr5* stem cells build crypt-villus structures in vitro without a mesenchymal niche. *Nature* *459*, 262-265.
- Snippert, H.J., van der Flier, L.G., Sato, T., van Es, J.H., van den Born, M., Kroon-Veenboer, C., Barker, N., Klein, A.M., van Rheenen, J., Simons, B.D., *et al.* (2010). Intestinal crypt homeostasis results from neutral competition between symmetrically dividing *Lgr5* stem cells. *Cell* *143*, 134-144.
- Steinhauser, M.L., Bailey, A.P., Senyo, S.E., Guillemier, C., Perlstein, T.S., Gould, A.P., Lee, R.T., and Lechene, C.P. (2012). Multi-isotope imaging mass spectrometry quantifies stem cell division and metabolism. *Nature* *481*, 516-519.
- Takeda, N., Jain, R., Leboeuf, M.R., Padmanabhan, A., Wang, Q., Li, L., Lu, M.M., Millar, S.E., and Epstein, J.A. (2013). *Hopx* expression defines a subset of multipotent hair follicle stem cells and a progenitor population primed to give rise to K6+ niche cells. *Development* *140*, 1655-1664.
- Takeda, N., Jain, R., LeBoeuf, M.R., Wang, Q., Lu, M.M., and Epstein, J.A. (2011). Interconversion between intestinal stem cell populations in distinct niches. *Science* *334*, 1420-1424.
- Tian, H., Biehs, B., Warming, S., Leong, K.G., Rangell, L., Klein, O.D., and de Sauvage, F.J. (2011). A reserve stem cell population in small intestine renders *Lgr5*-positive cells dispensable. *Nature* *478*, 255-259.
- van Es, J.H., Sato, T., van de Wetering, M., Lyubimova, A., Nee, A.N., Gregorieff, A., Sasaki, N., Zeinstra, L., van den Born, M., Korving, J., *et al.* (2012). *Dll1*+ secretory progenitor cells revert to stem cells upon crypt damage. *Nature cell biology* *14*, 1099-1104.
- Wang, F., Wang, J., Liu, D., and Su, Y. (2010). Normalizing genes for real-time polymerase chain reaction in epithelial and nonepithelial cells of mouse small intestine. *Analytical biochemistry* *399*, 211-217.
- Yan, K.S., Chia, L.A., Li, X., Ootani, A., Su, J., Lee, J.Y., Su, N., Luo, Y., Heilshorn, S.C., Amieva, M.R., *et al.* (2012). The intestinal stem cell markers *Bmi1* and *Lgr5* identify two functionally distinct populations. *Proceedings of the National Academy of Sciences of the United States of America* *109*, 466-471.
- Yui, S., Nakamura, T., Sato, T., Nemoto, Y., Mizutani, T., Zheng, X., Ichinose, S., Nagaishi, T., Okamoto, R., Tsuchiya, K., *et al.* (2012). Functional engraftment of colon epithelium expanded in vitro from a single adult *Lgr5*(+) stem cell. *Nature medicine* *18*, 618-623.
